# Supplementary material
Source: PubMed Central journal article supplement (PMC6828160)

**PRDM16**  
Kruskal.p= 7.67e-18

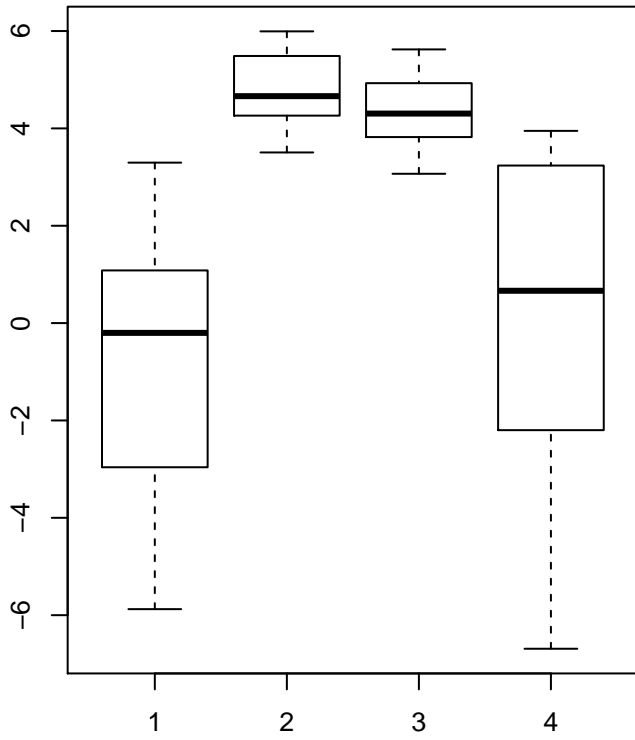

**MIR10A**  
Kruskal.p= 4.046e-17

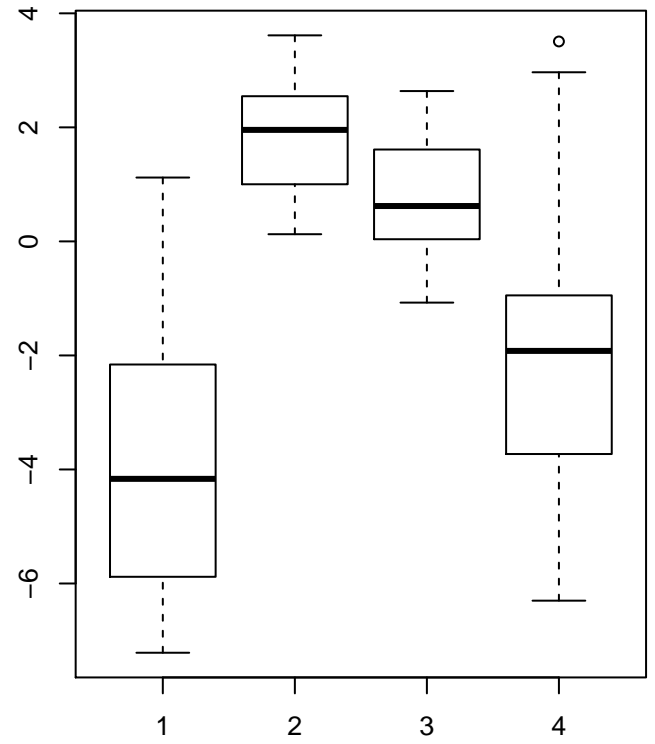

**HOXB-AS3**  
Kruskal.p= 5.925e-17

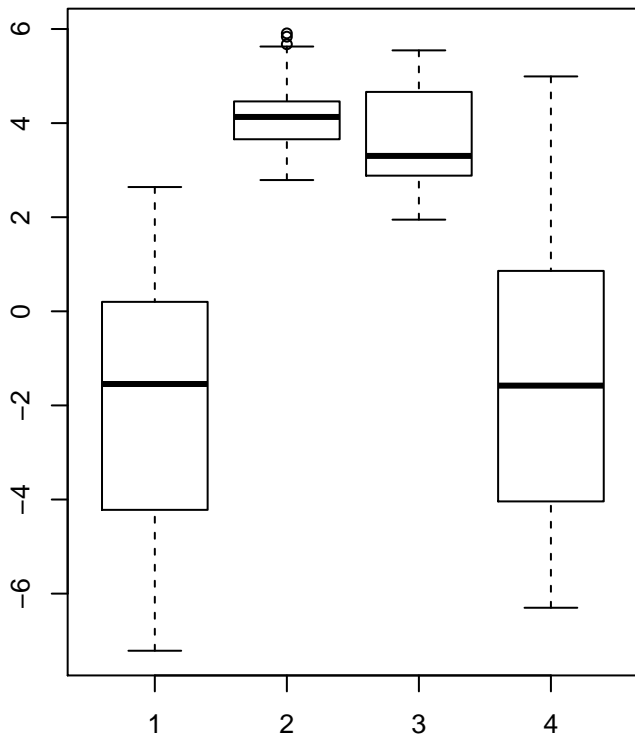

**LINC00982**  
Kruskal.p= 1.043e-16

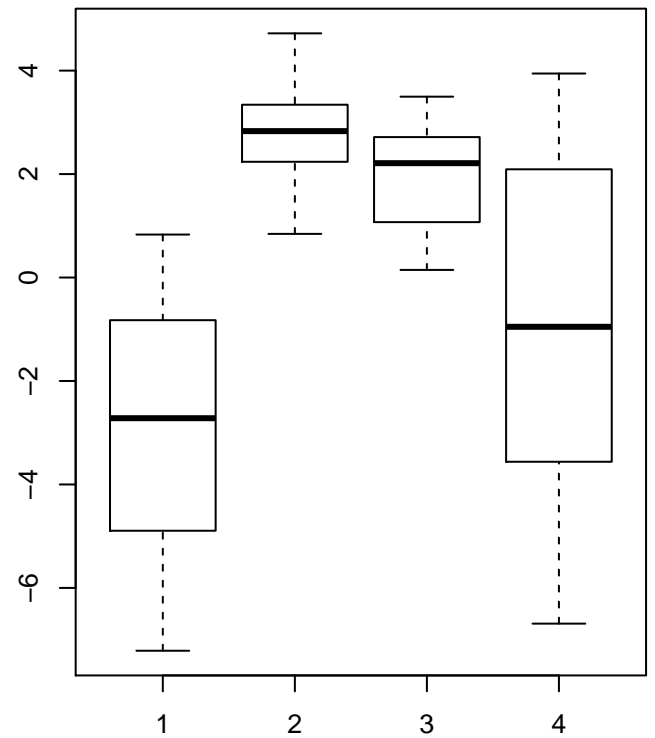

**HOXB8**  
Kruskal.p= 1.731e-16

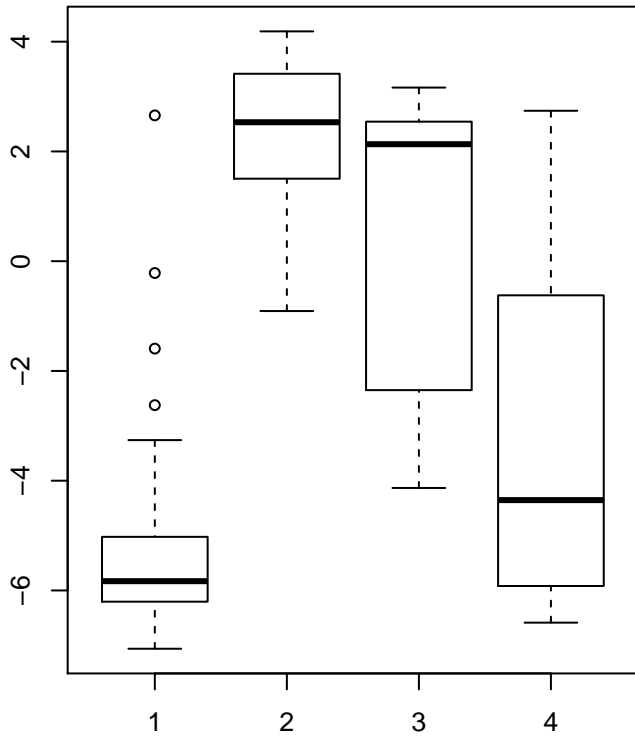

**HOXB6**  
Kruskal.p= 1.187e-15

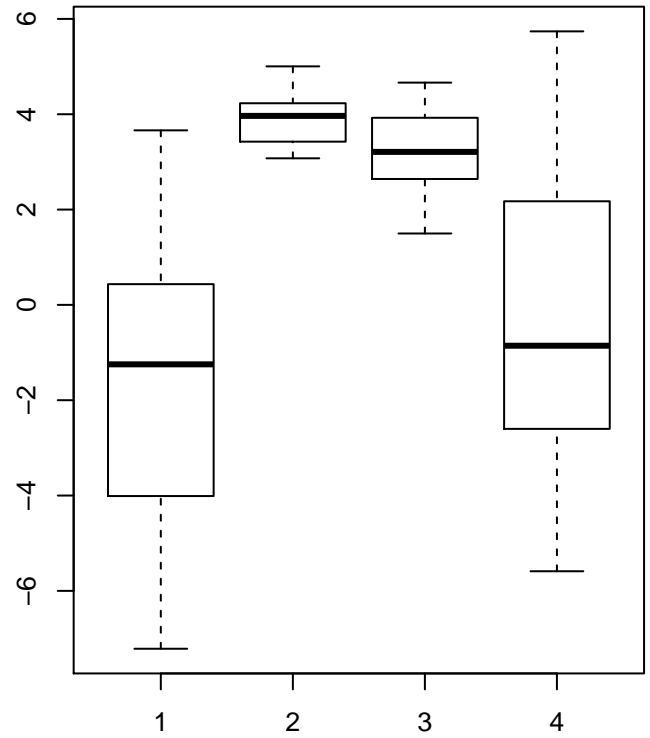

**NKX2-3**  
Kruskal.p= 1.734e-15

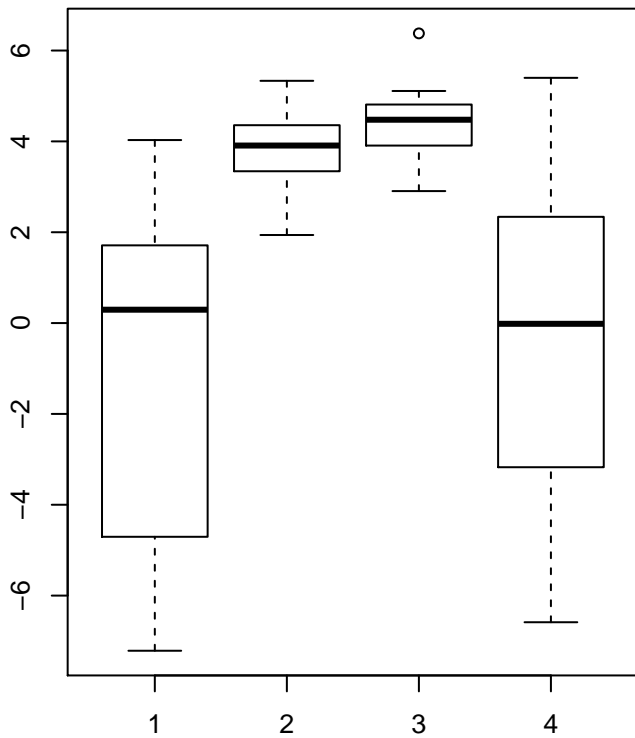

**AC016629.3**  
Kruskal.p= 2.553e-15

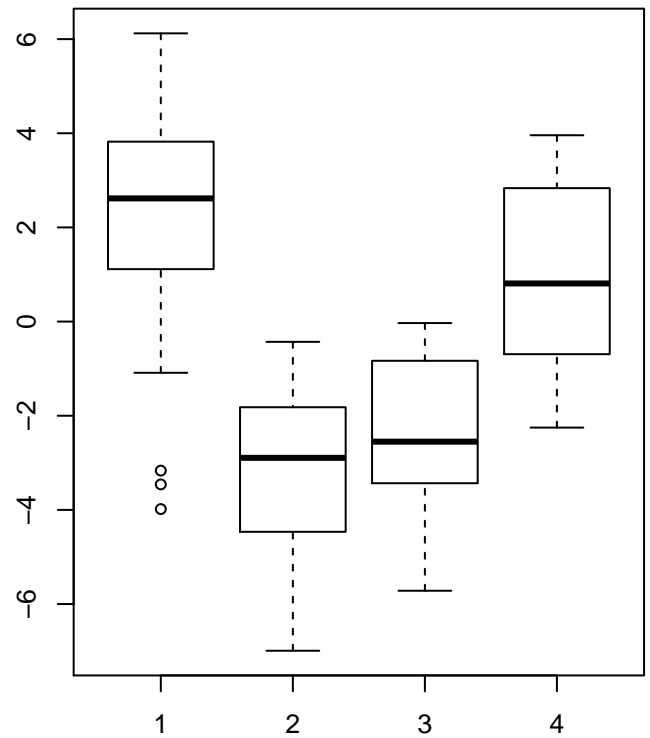

**HOXB5**  
Kruskal.p= 4.761e-15

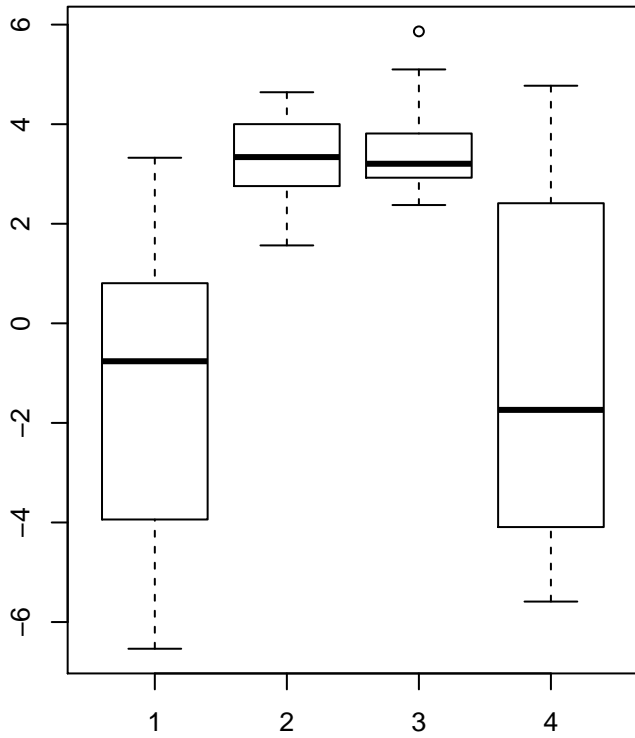

**LTF**  
Kruskal.p= 4.993e-15

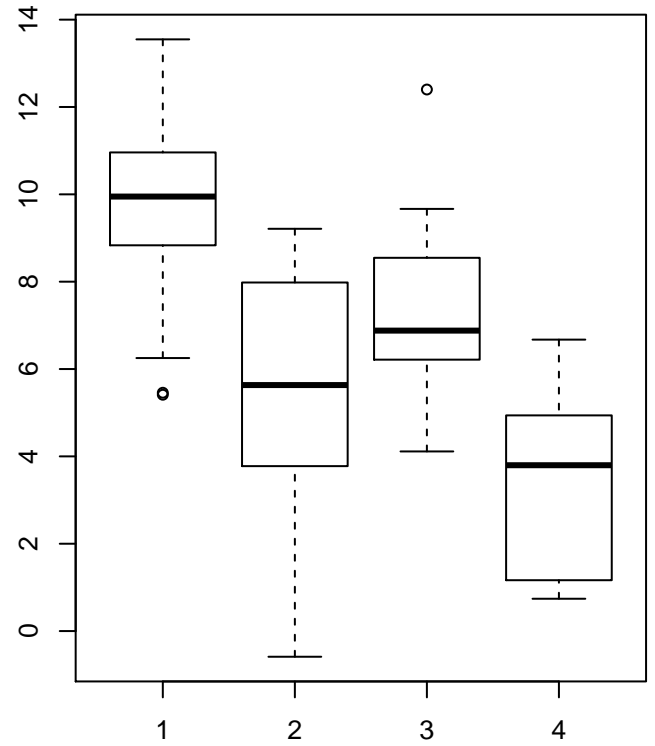

**HOXB9**  
Kruskal.p= 2.172e-14

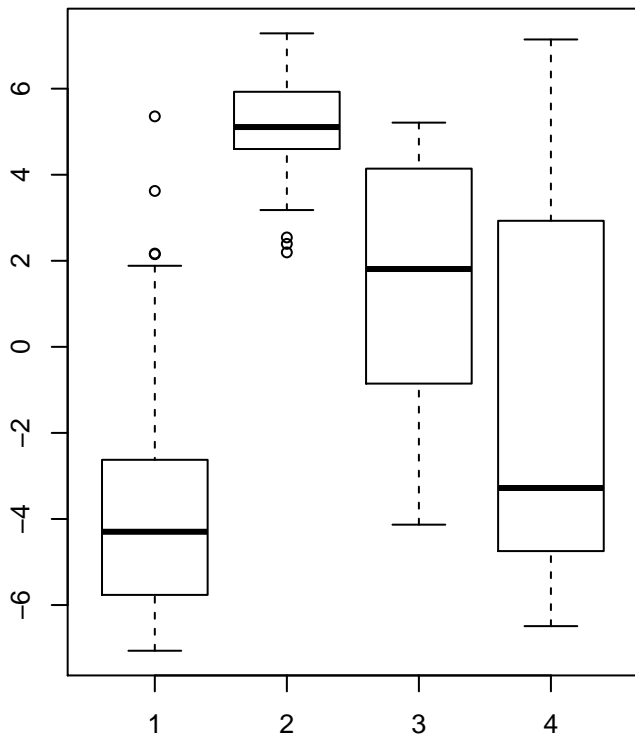

**REG1B**  
Kruskal.p= 4.47e-14

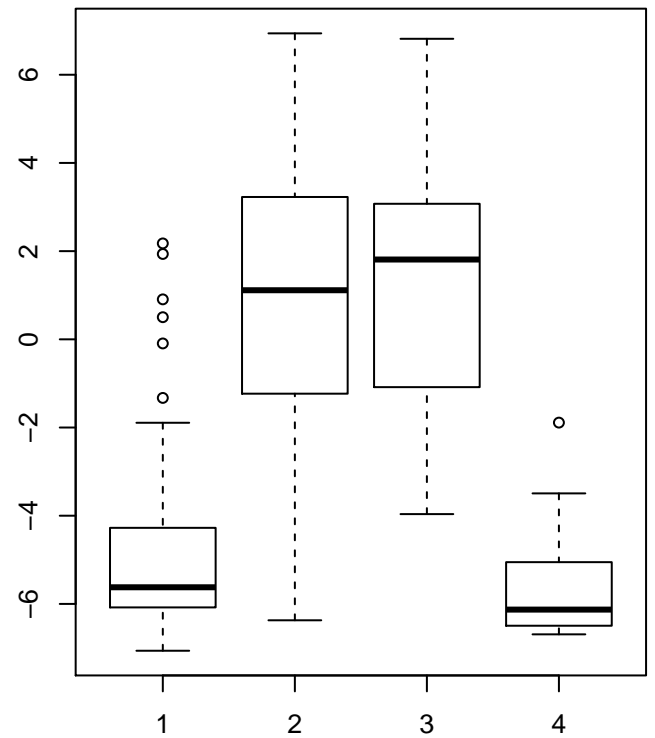

**PPAPDC1A**  
Kruskal.p= 8.039e-14

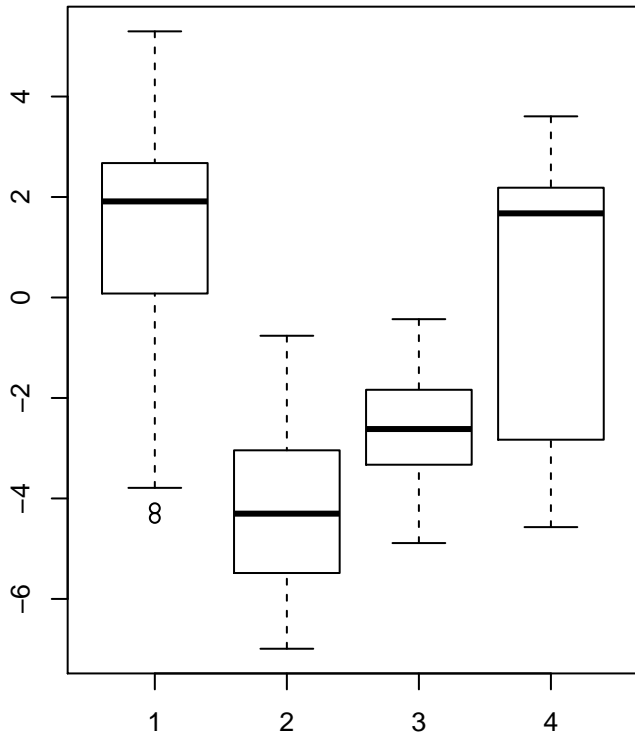

**CTD-3179P9.1**  
Kruskal.p= 2.499e-13

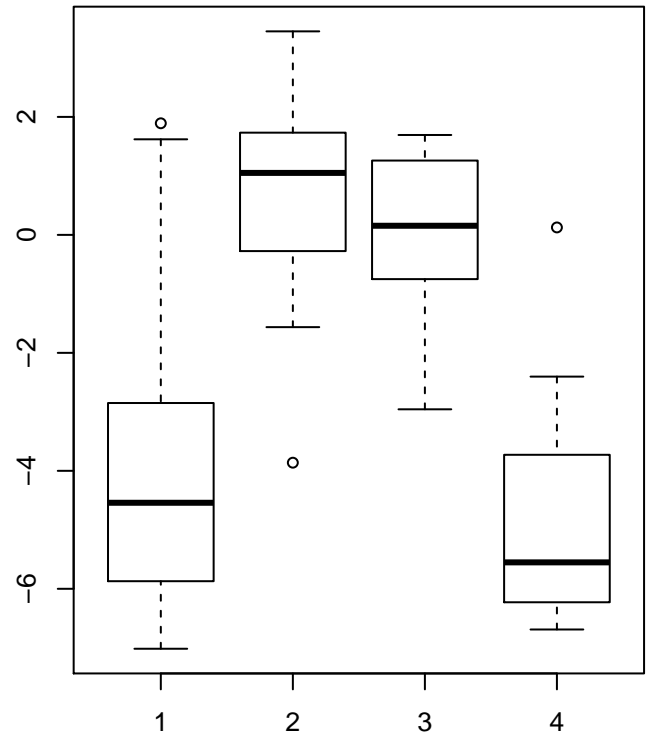

**KRT13**  
Kruskal.p= 3.017e-13

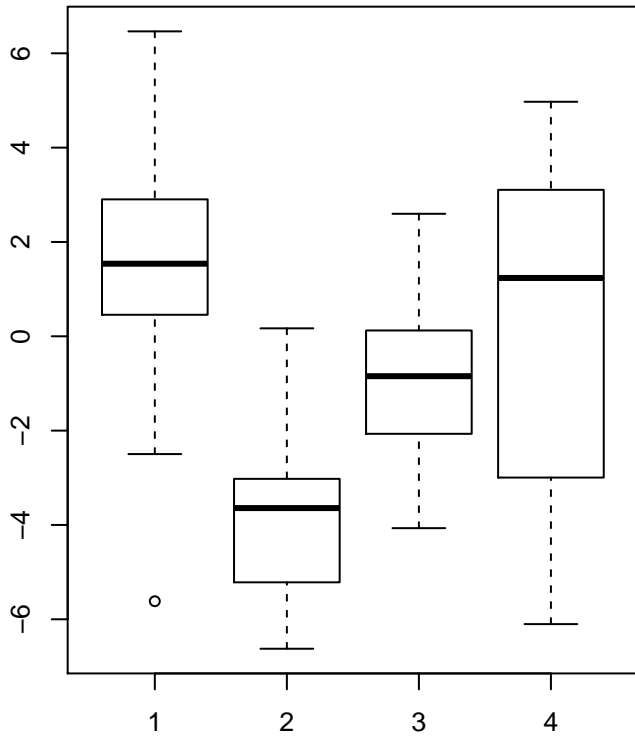

**CHI3L1**  
Kruskal.p= 3.842e-13

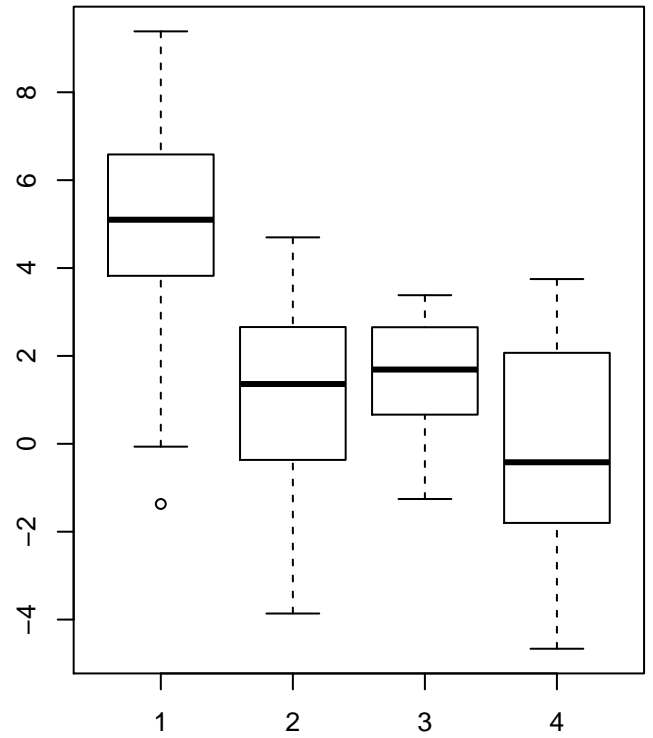

**U3**  
Kruskal.p= 3.809e-12

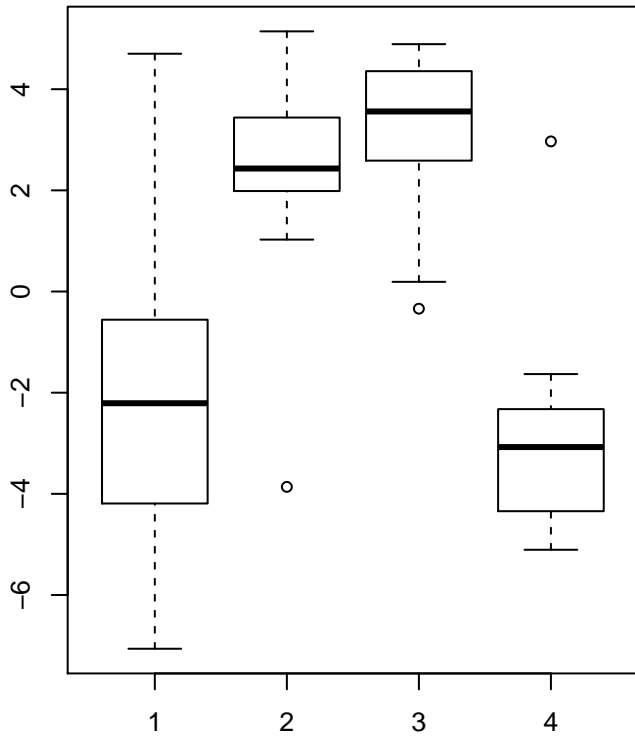

**REG1A**  
Kruskal.p= 4.042e-12

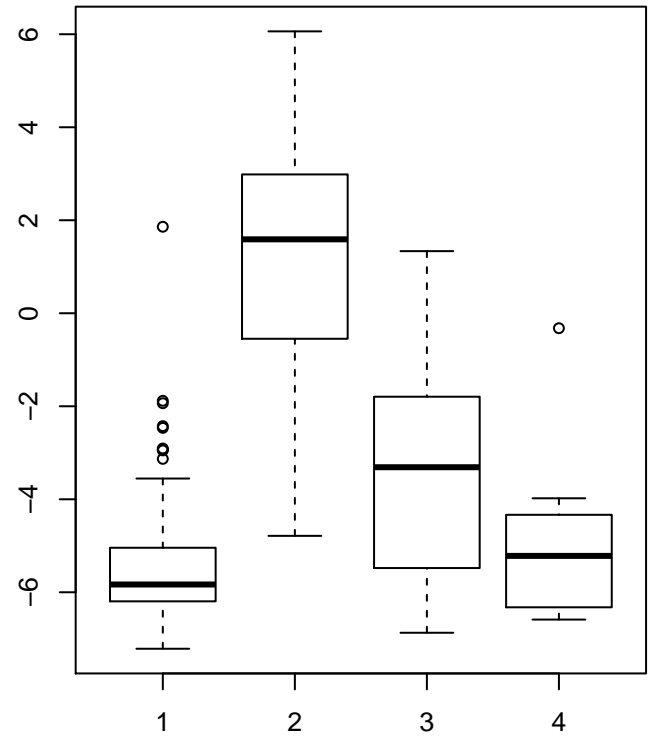

**AC016735.1**  
Kruskal.p= 4.596e-12

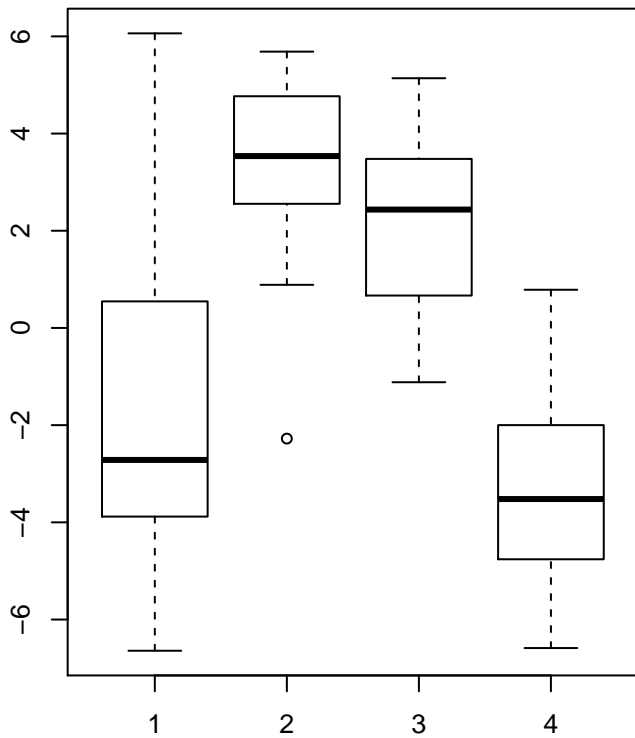

**CAMP**  
Kruskal.p= 6.737e-12

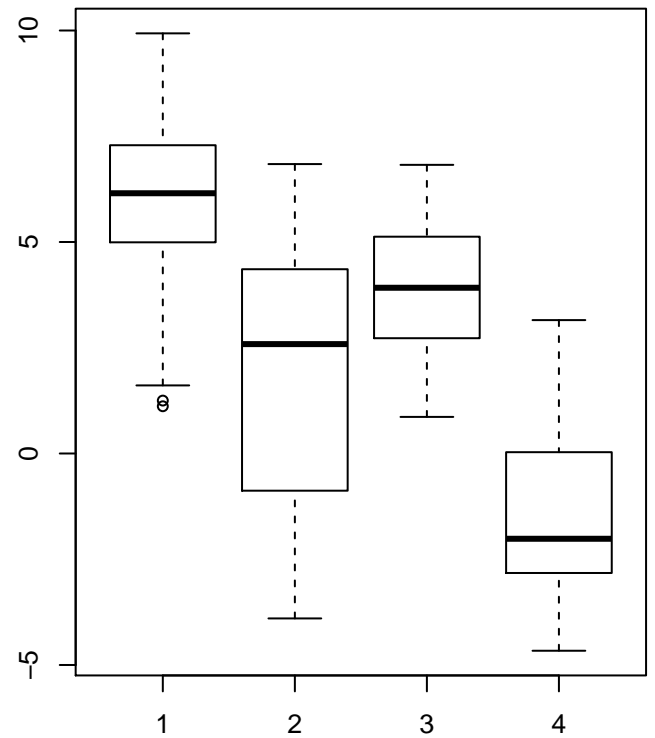

**MEG3**  
Kruskal.p= 7.202e-12

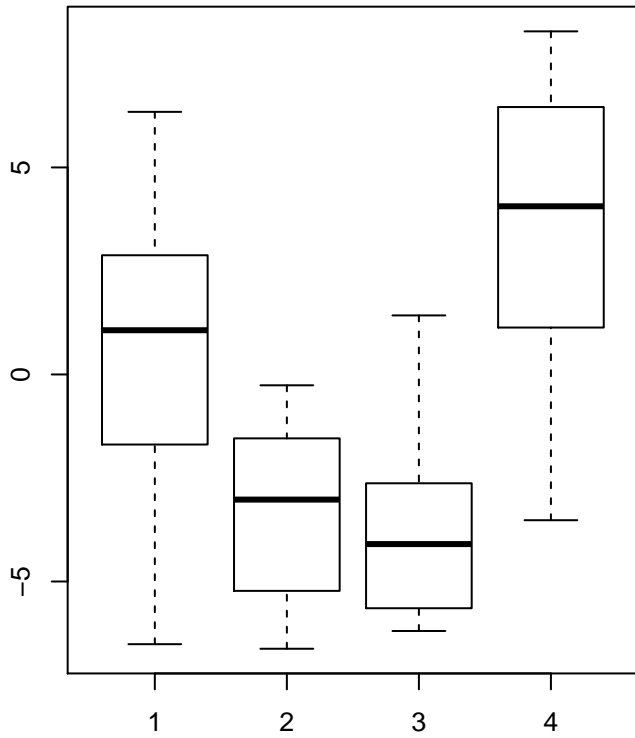

**IRX5**  
Kruskal.p= 1.071e-11

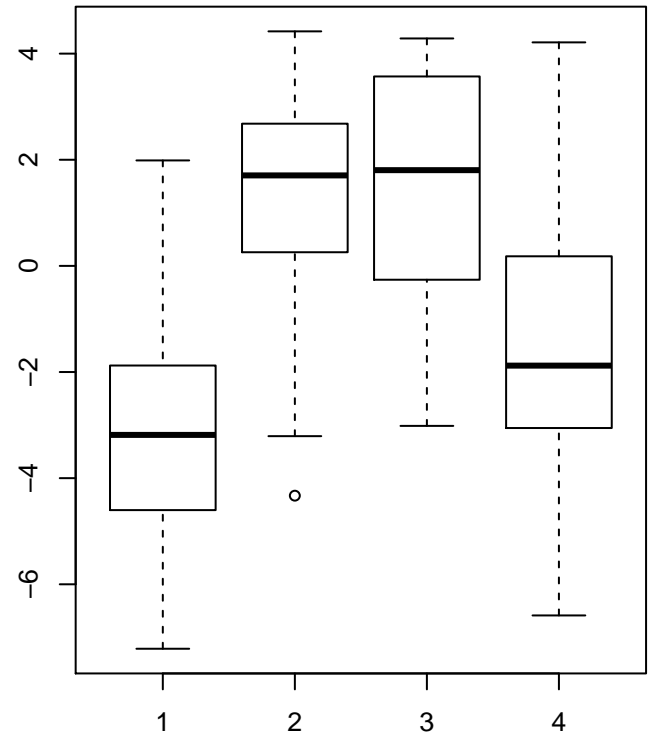

**SLC25A21**  
Kruskal.p= 2.193e-11

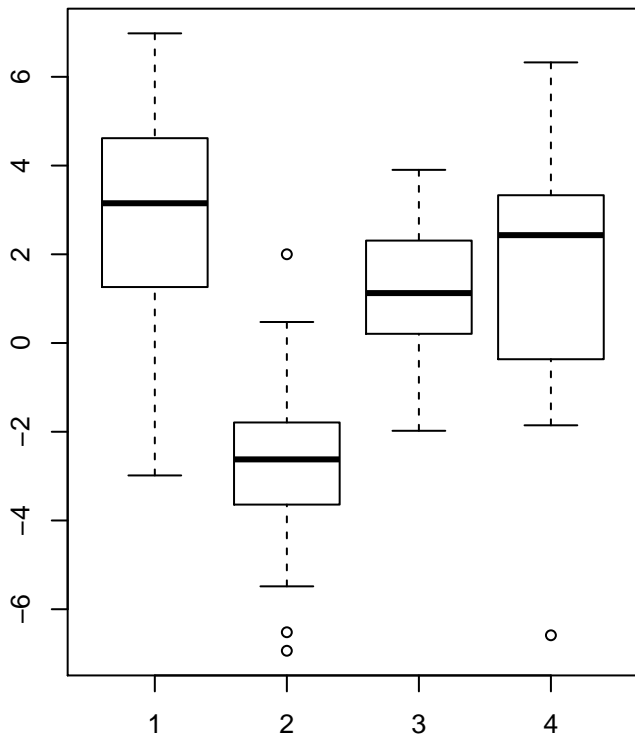

**PKNOX2**  
Kruskal.p= 2.329e-11

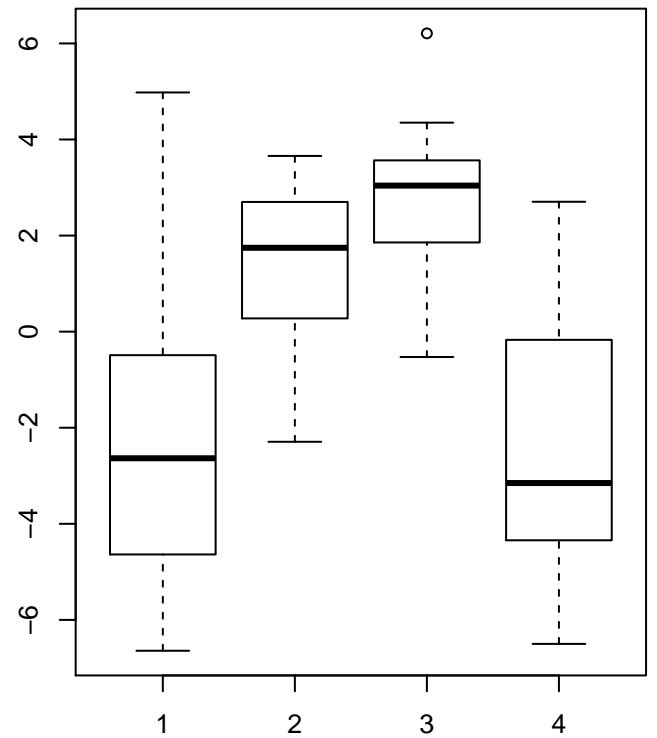

**CYYR1**  
Kruskal.p= 2.67e-11

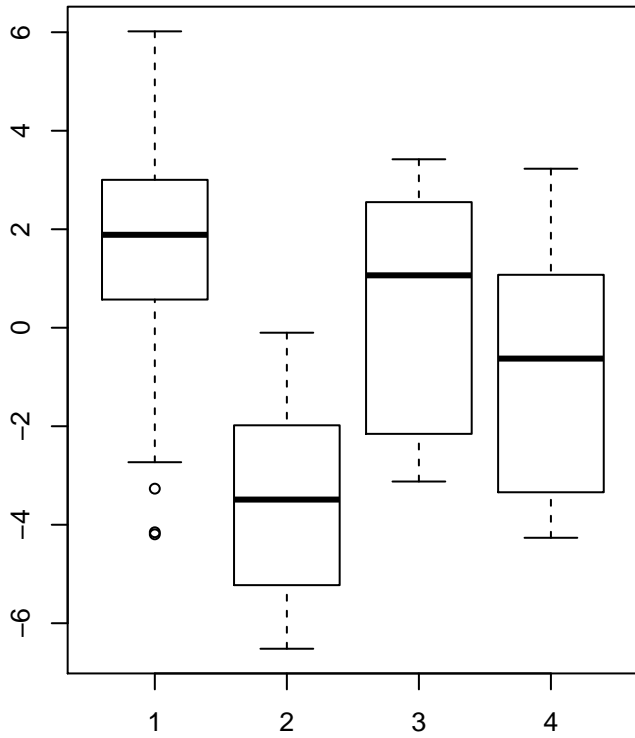

**HOXA11**  
Kruskal.p= 3.034e-11

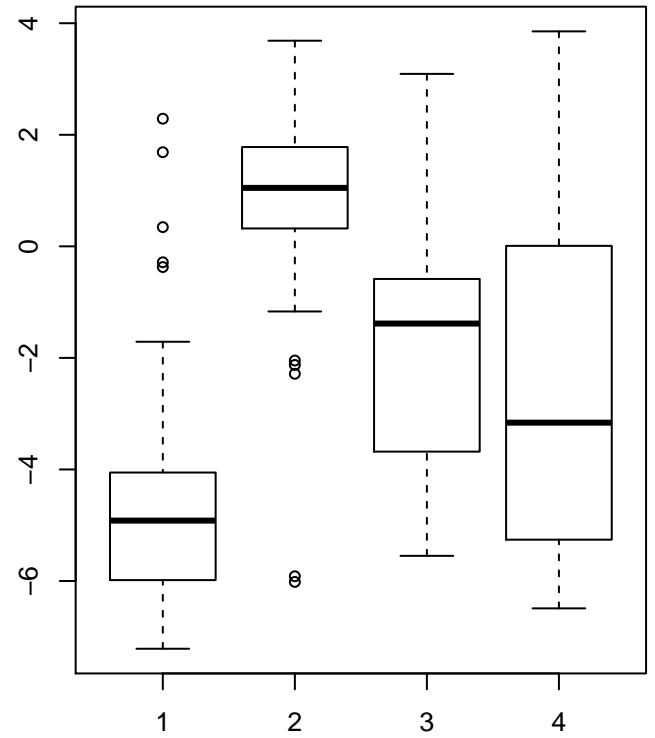

**COL17A1**  
Kruskal.p= 7.825e-11

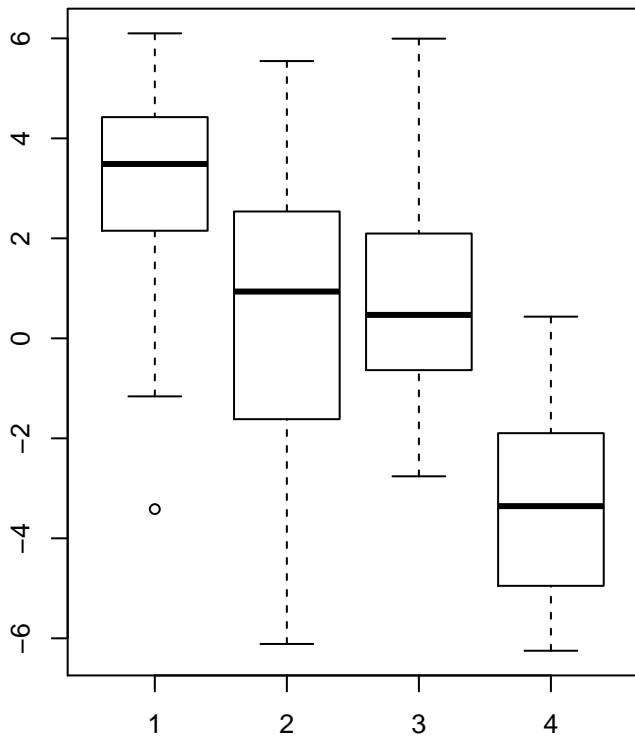

**CEACAM6**  
Kruskal.p= 1.752e-10

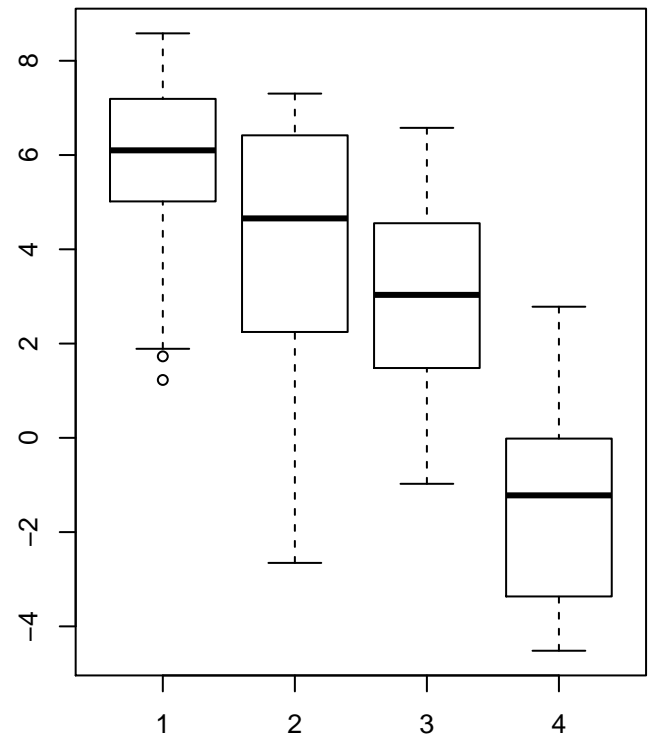

**HMGA2**  
Kruskal.p= 1.949e-10

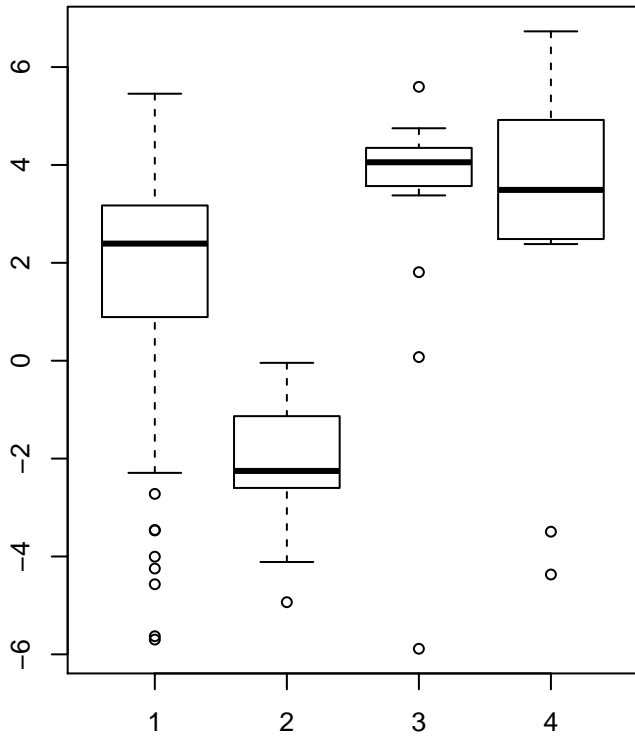

**TMEM246**  
Kruskal.p= 2.124e-10

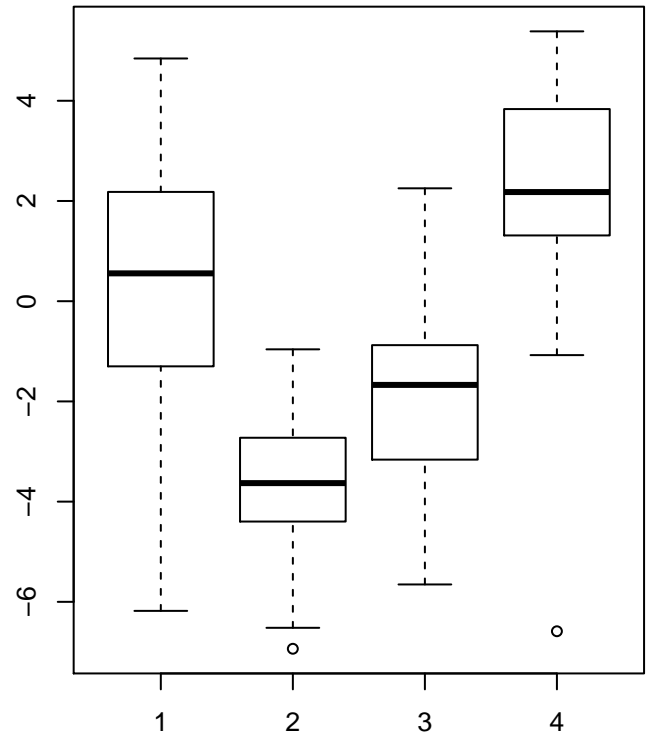

**AL132709.5**  
Kruskal.p= 2.624e-10

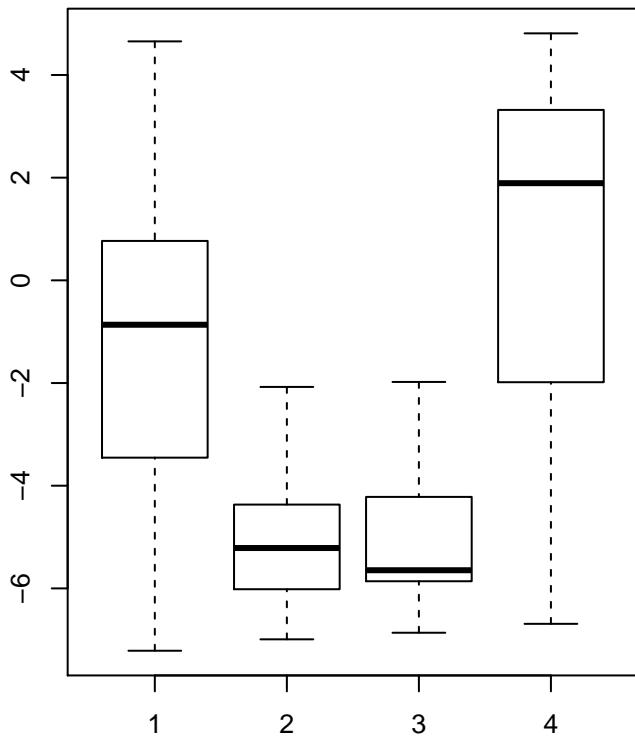

**ORM1**  
Kruskal.p= 3.534e-10

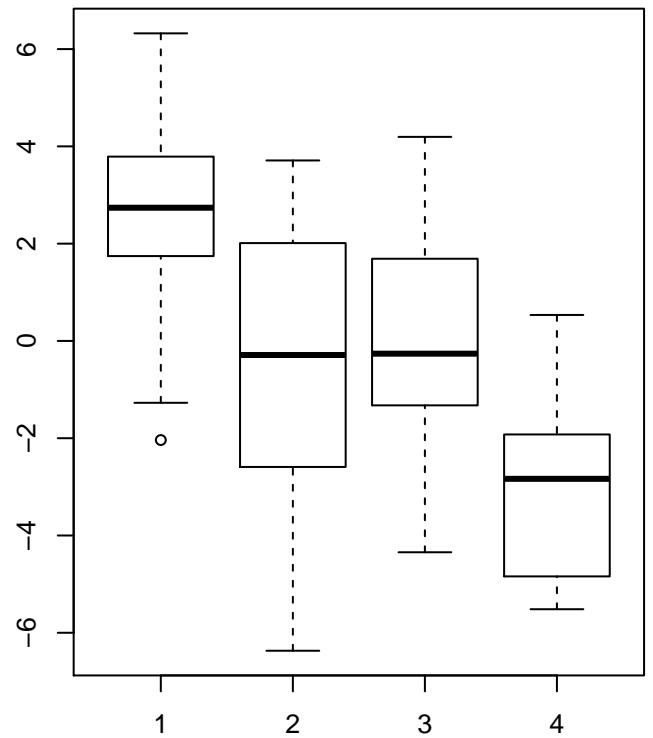



**C20orf166-AS1**  
Kruskal.p= 4.302e-10

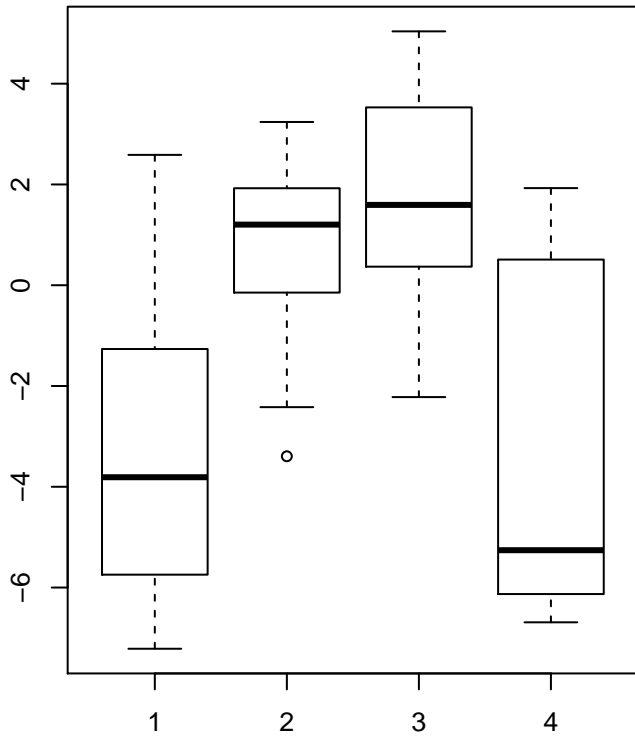

**PLOD2**  
Kruskal.p= 4.45e-10

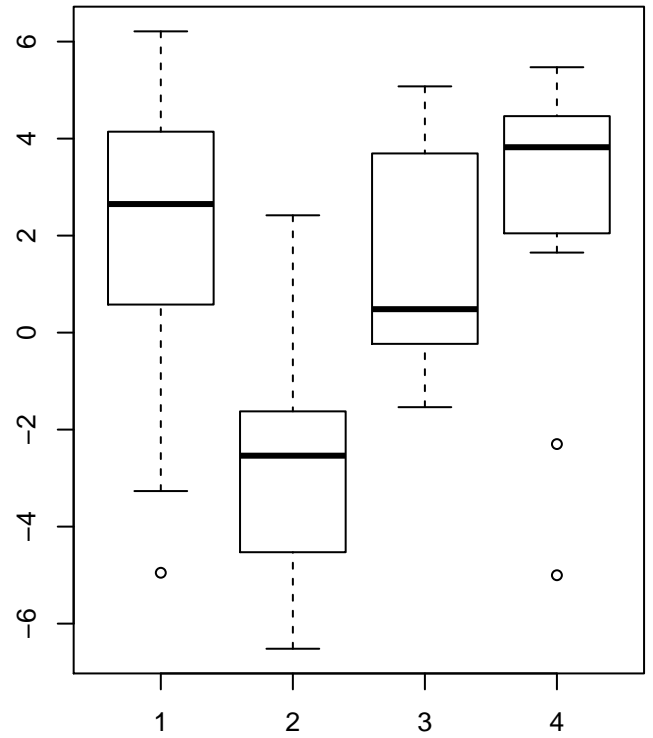

**CSDC2**  
Kruskal.p= 4.69e-10

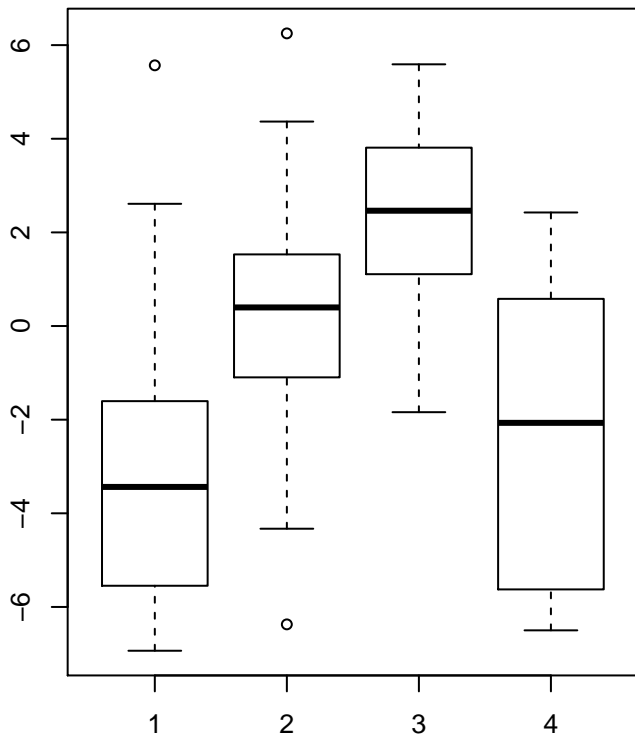

**GJB6**  
Kruskal.p= 4.771e-10

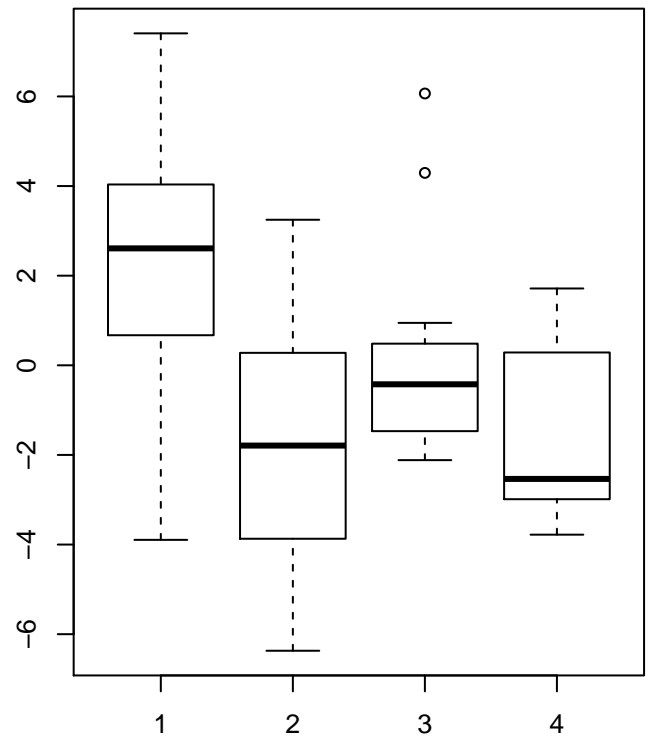

**OLFM4**  
Kruskal.p= 6.693e-10

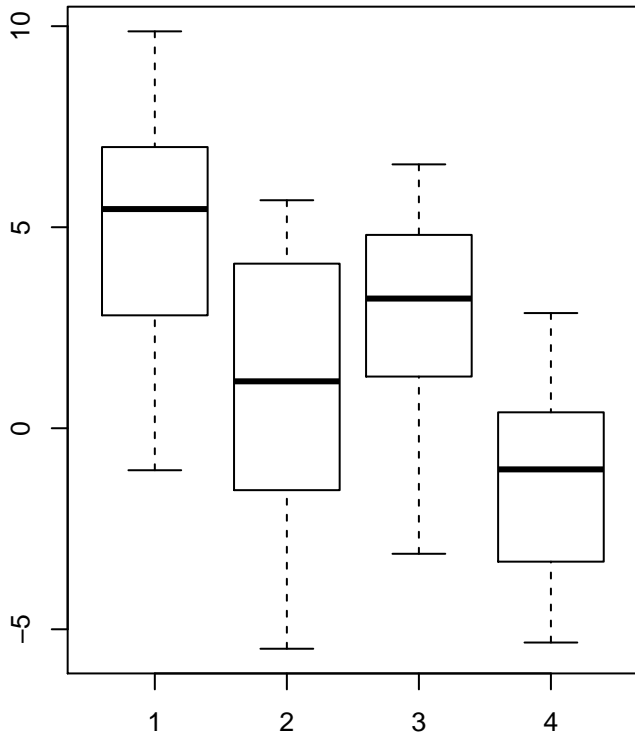

**DLK1**  
Kruskal.p= 8.828e-10

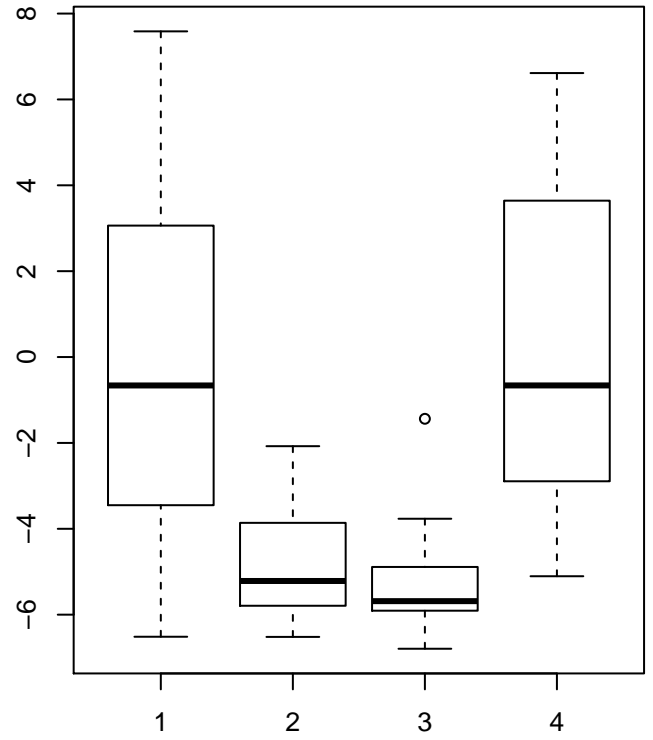

**CEACAM8**  
Kruskal.p= 1.612e-09

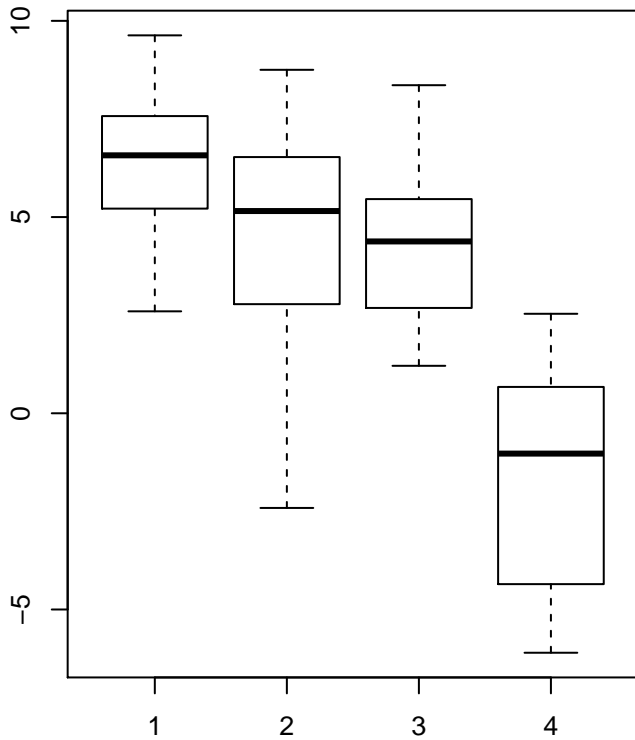

**DEFA3**  
Kruskal.p= 3.244e-09

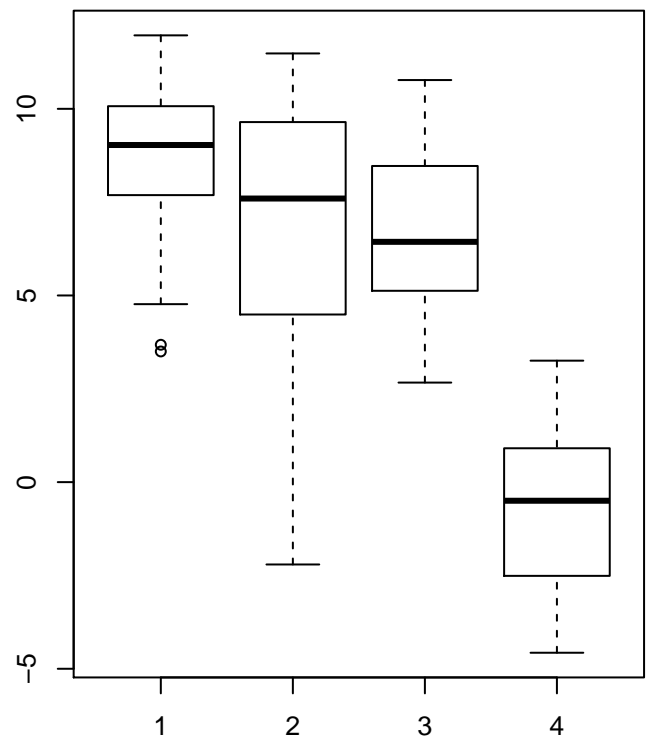

**PGLYRP1**  
Kruskal.p= 4.534e-09

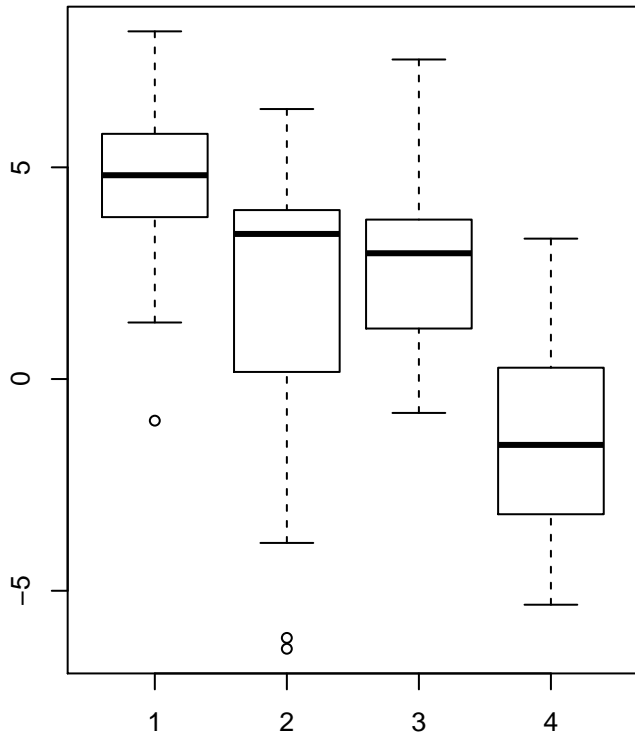

**GJA1**  
Kruskal.p= 7.229e-09

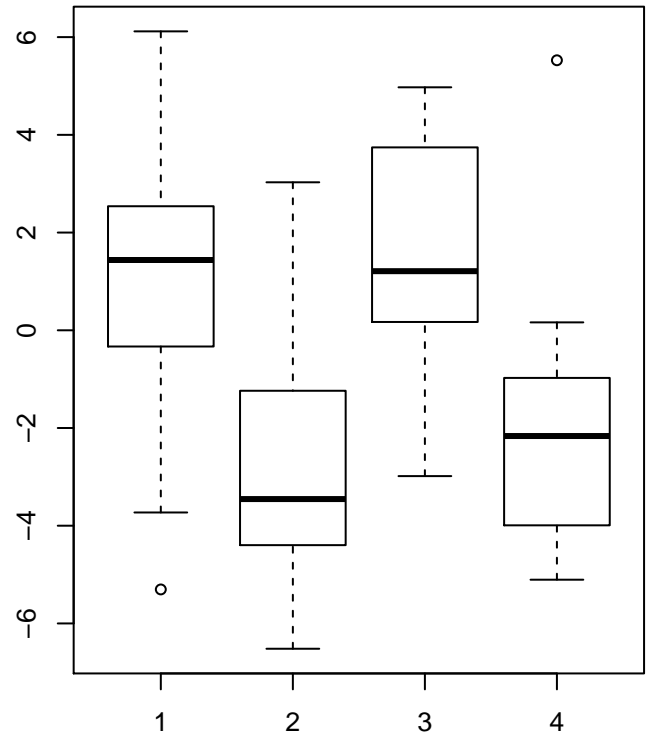

**CCDC8**  
Kruskal.p= 8.461e-09

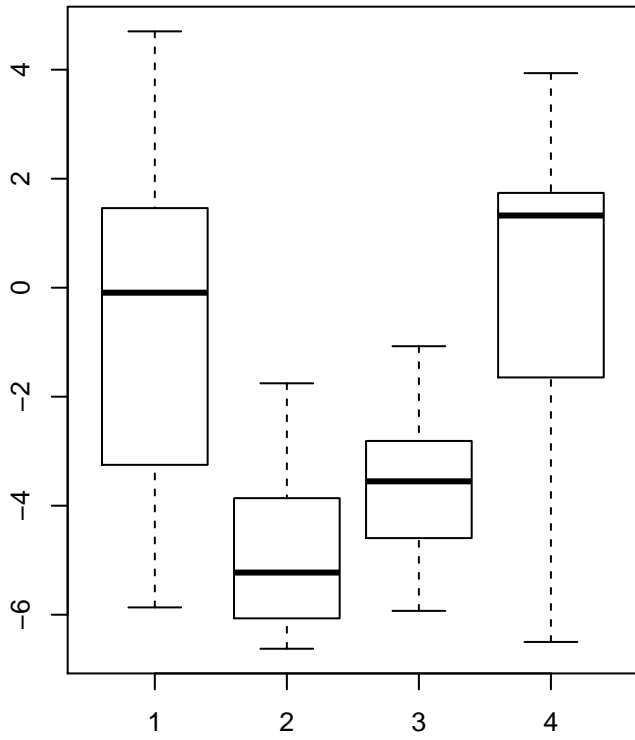

**FGD5**  
Kruskal.p= 1.038e-08

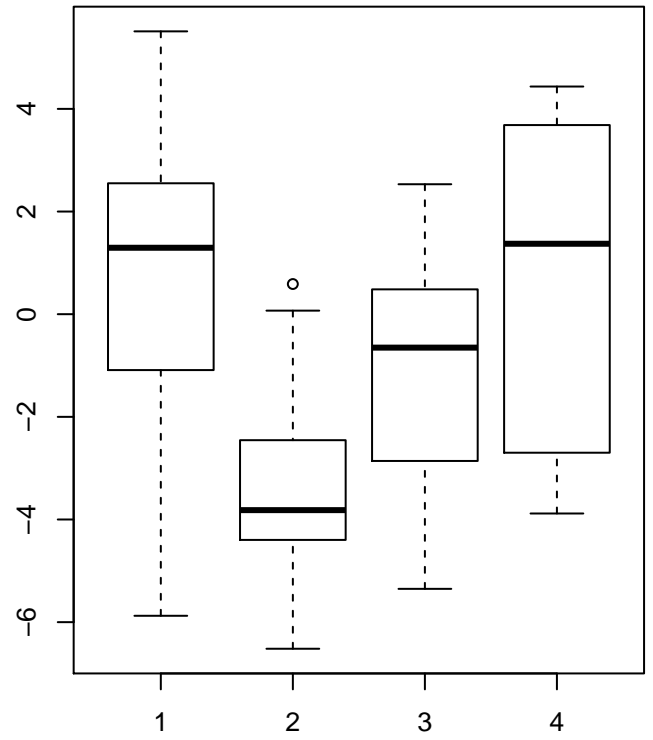

**FREM1**  
Kruskal.p= 1.474e-08

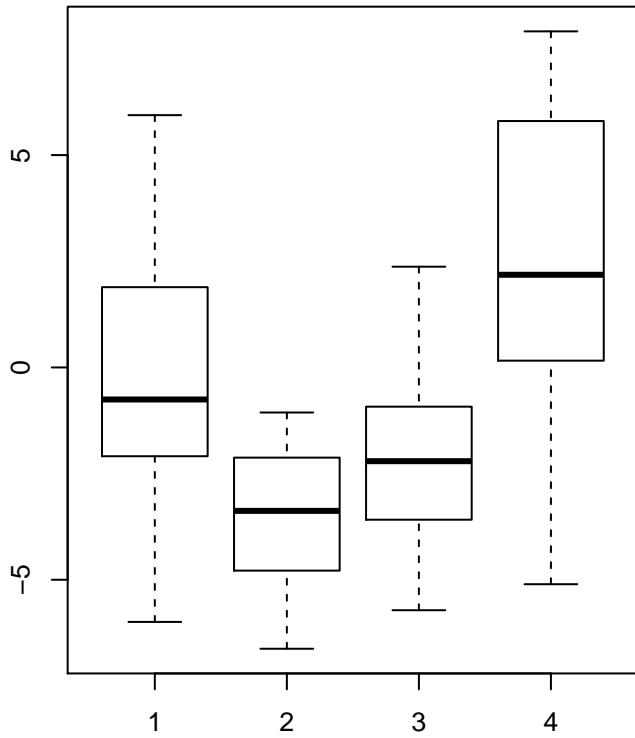

**MMP8**  
Kruskal.p= 1.626e-08

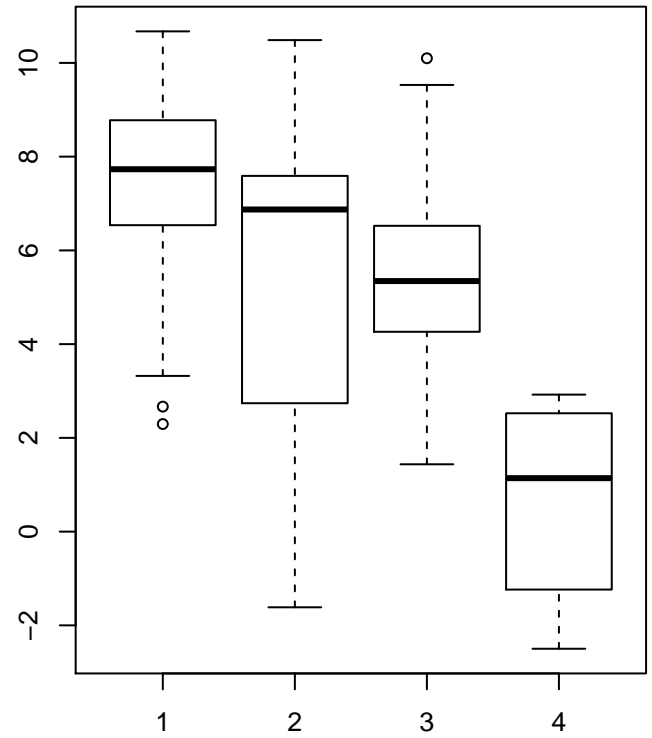

**THEM5**  
Kruskal.p= 3.035e-08

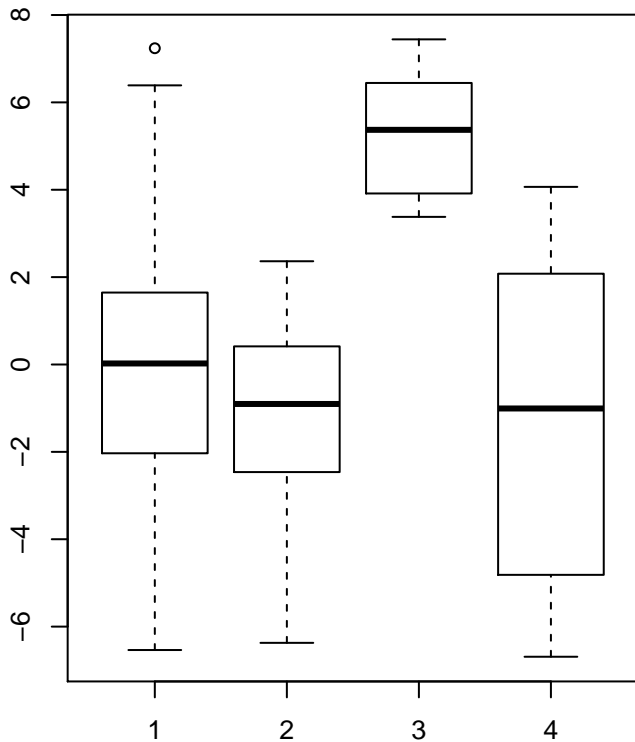

**RP11-497G19.1**  
Kruskal.p= 3.929e-08

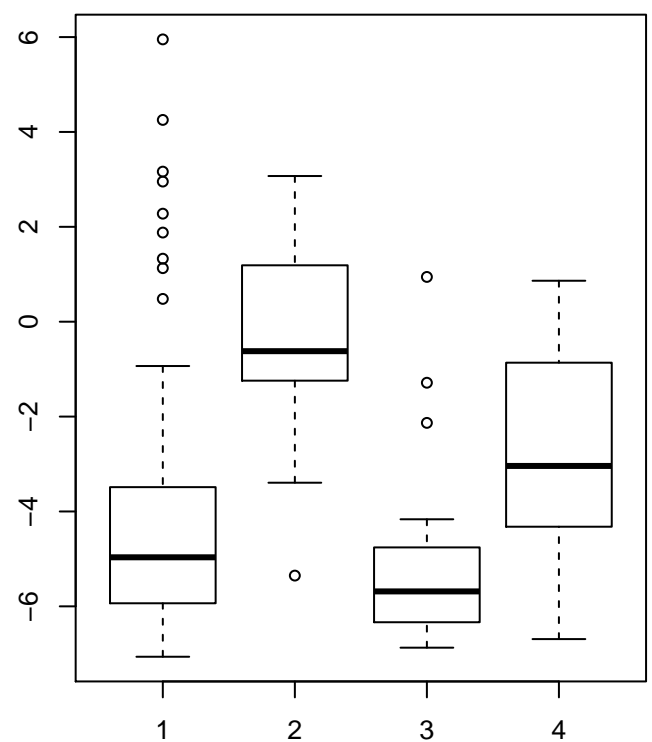

**DEFA1**  
Kruskal.p= 4.43e-08

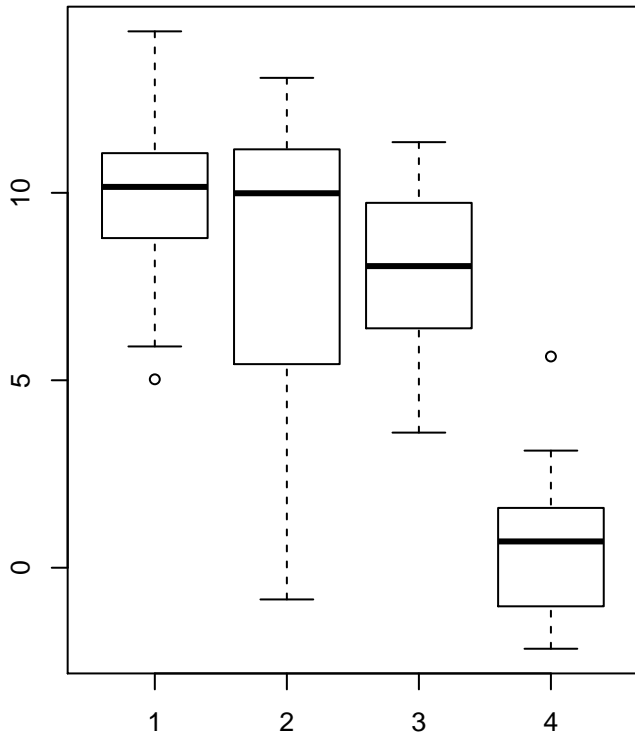

**PRG3**  
Kruskal.p= 6.35e-08

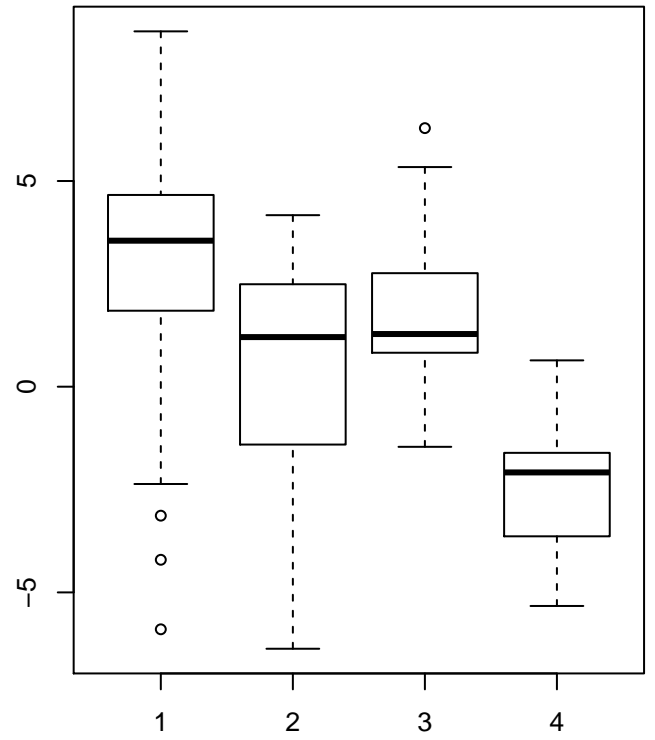

**MECOM**  
Kruskal.p= 8.07e-08

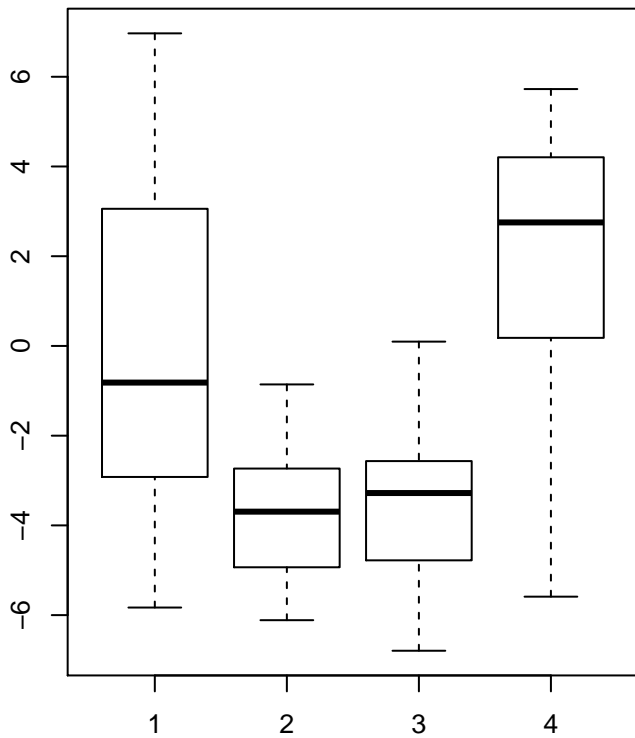

**CTD-264317.1**  
Kruskal.p= 1.004e-07

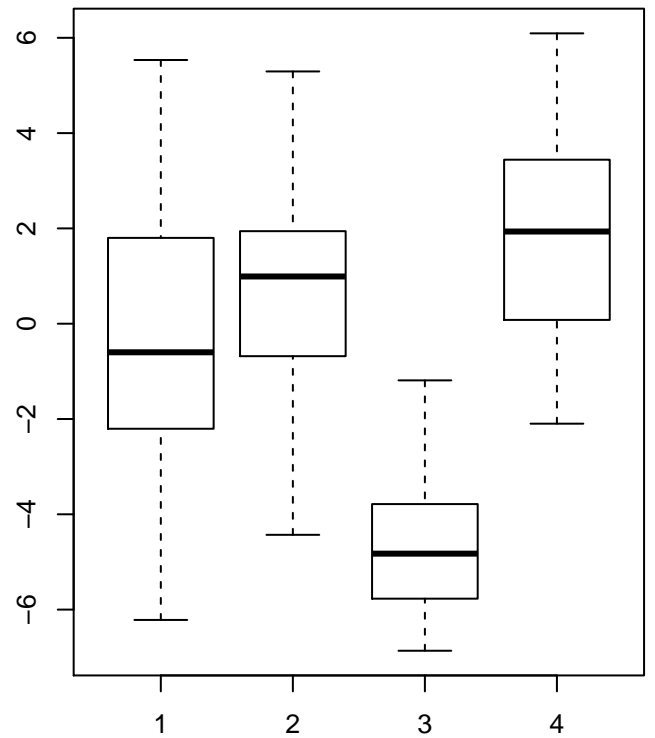

**NMU**  
Kruskal.p= 1.18e-07

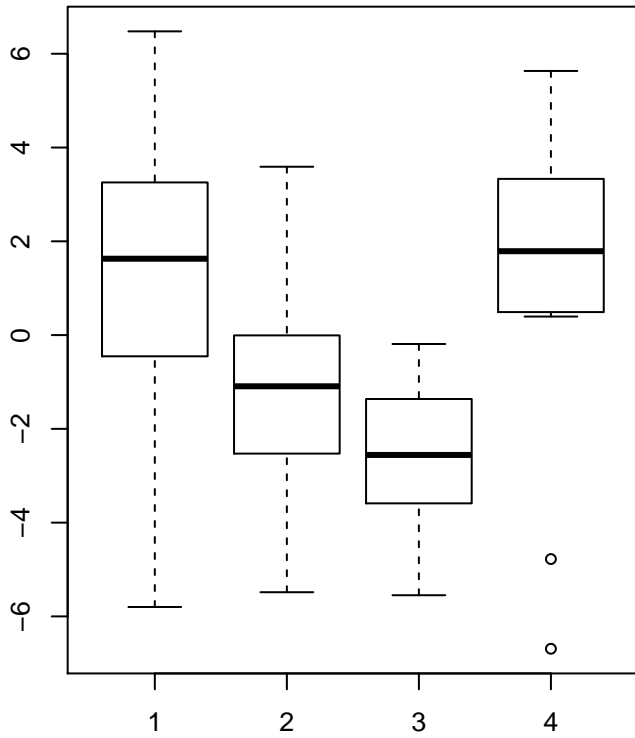

**RP11-388P9.2**  
Kruskal.p= 1.499e-07

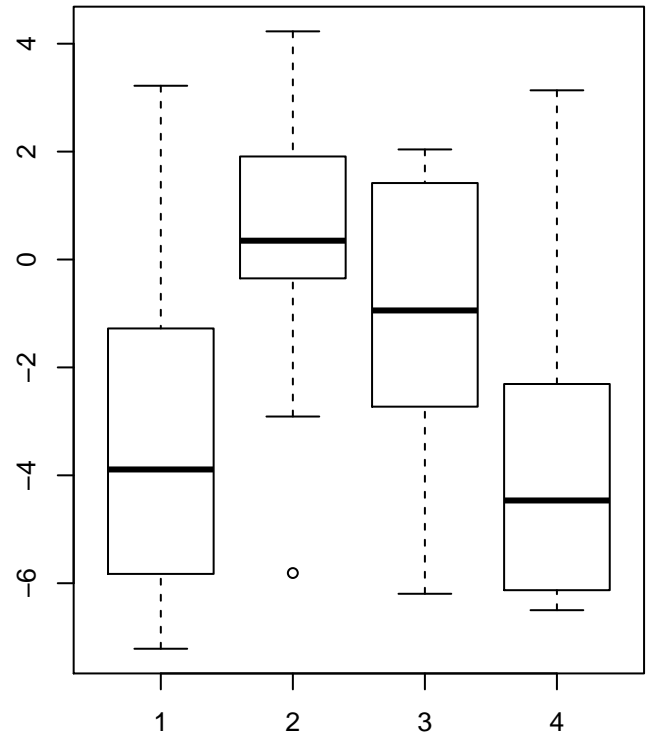

**DEFA1B**  
Kruskal.p= 1.773e-07

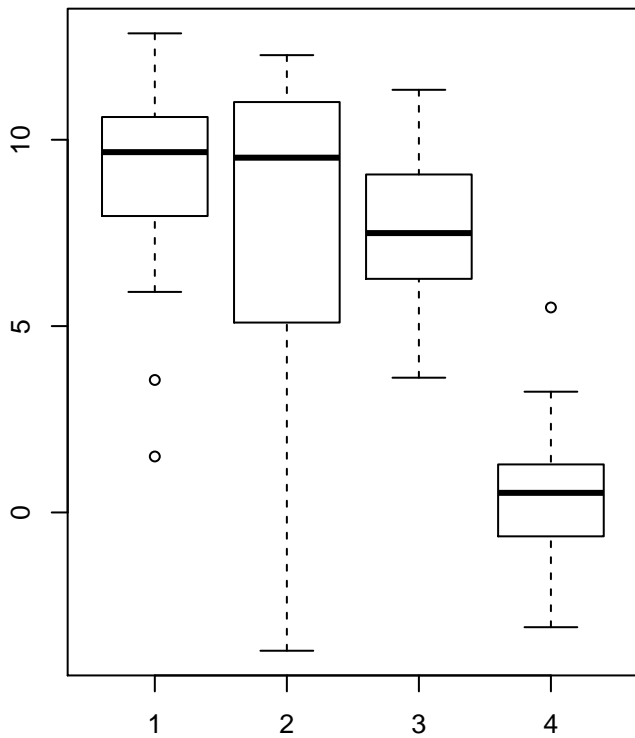

**AF131216.5**  
Kruskal.p= 2.322e-07

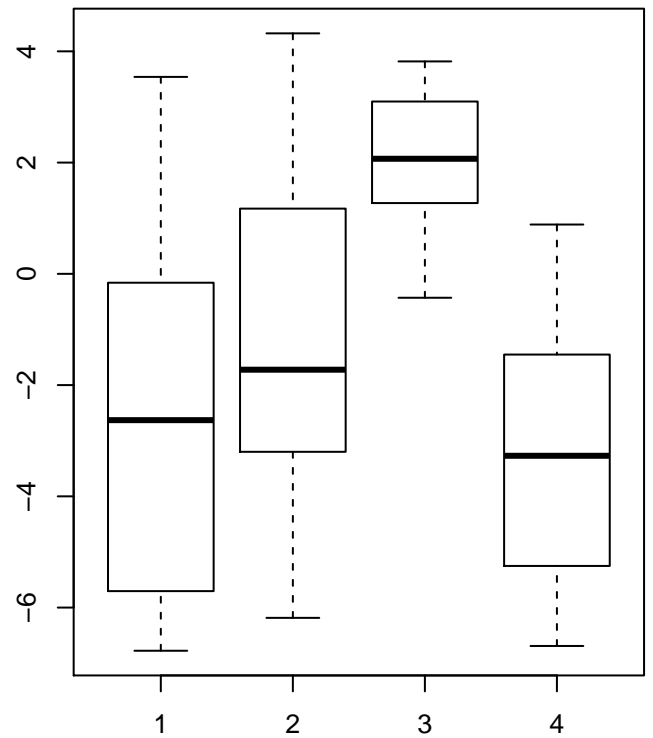

**DEFA4**  
Kruskal.p= 3.7e-07

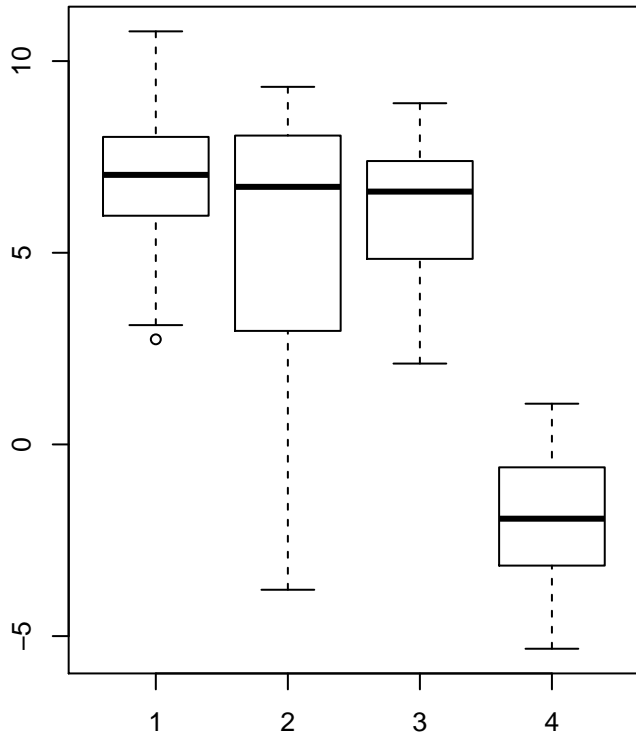

**XXyac-YM21GA2.7**  
Kruskal.p= 4.968e-07

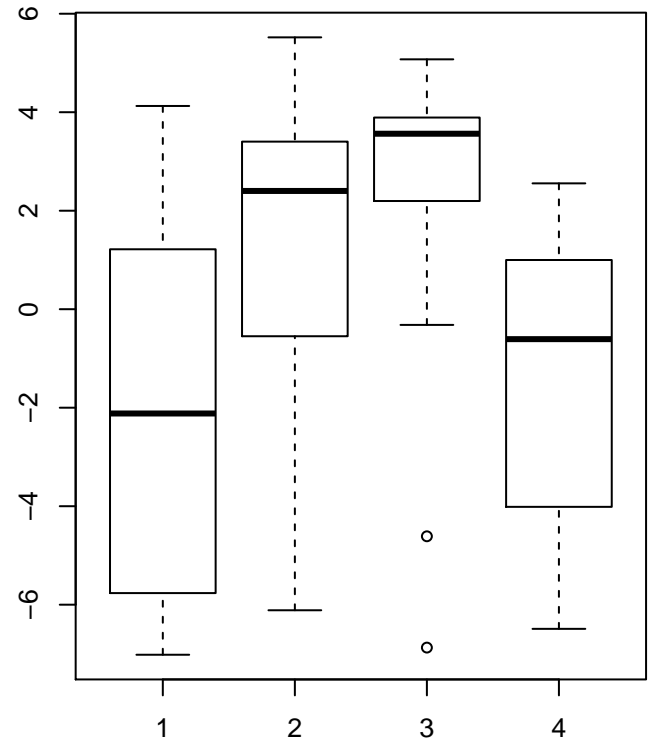

**GTSF1**  
Kruskal.p= 4.979e-07

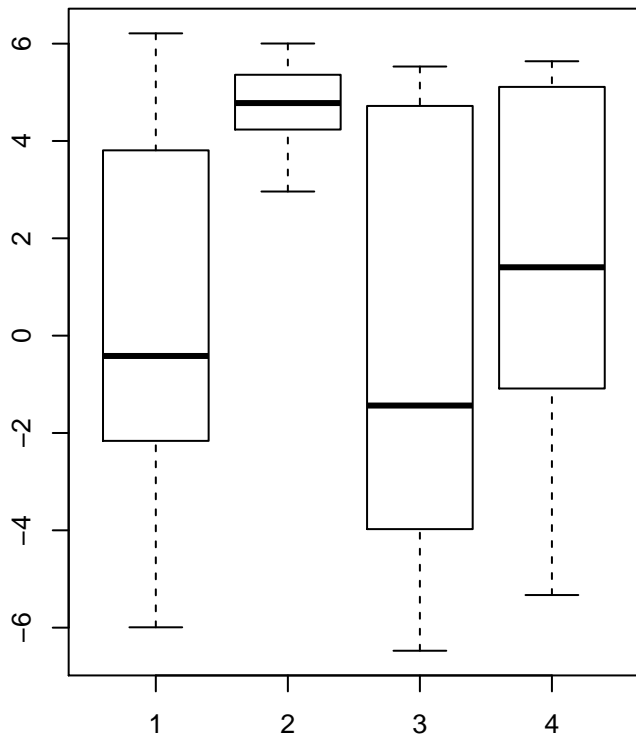

**MEDAG**  
Kruskal.p= 7.901e-07

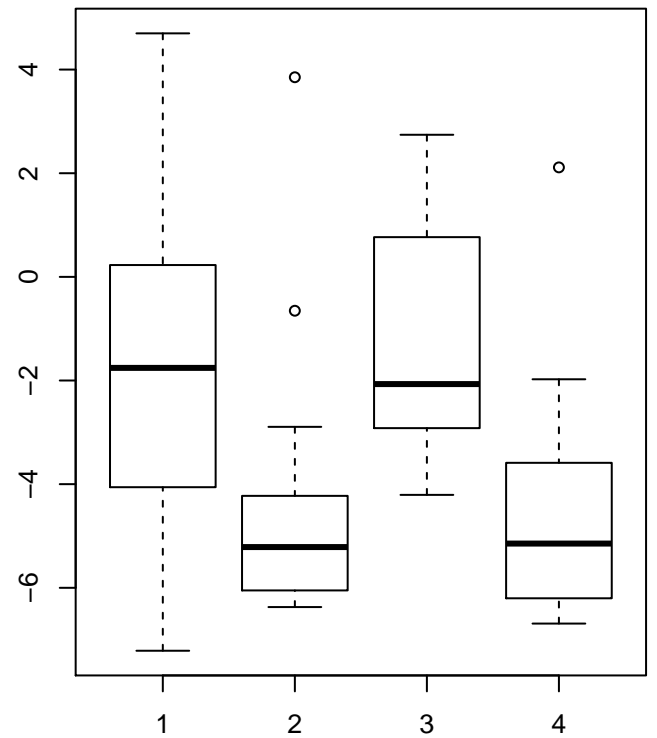

**HBG2**  
Kruskal.p= 1.16e-06

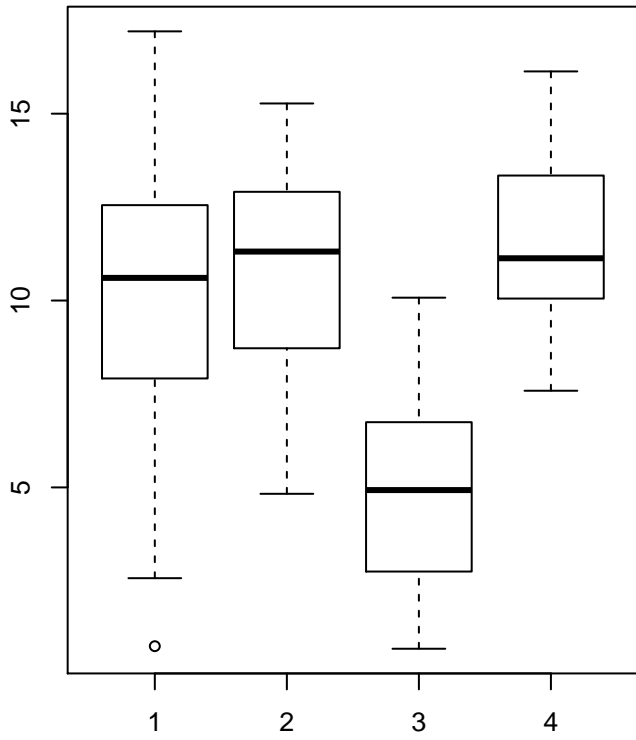

**HBG1**  
Kruskal.p= 2.068e-06

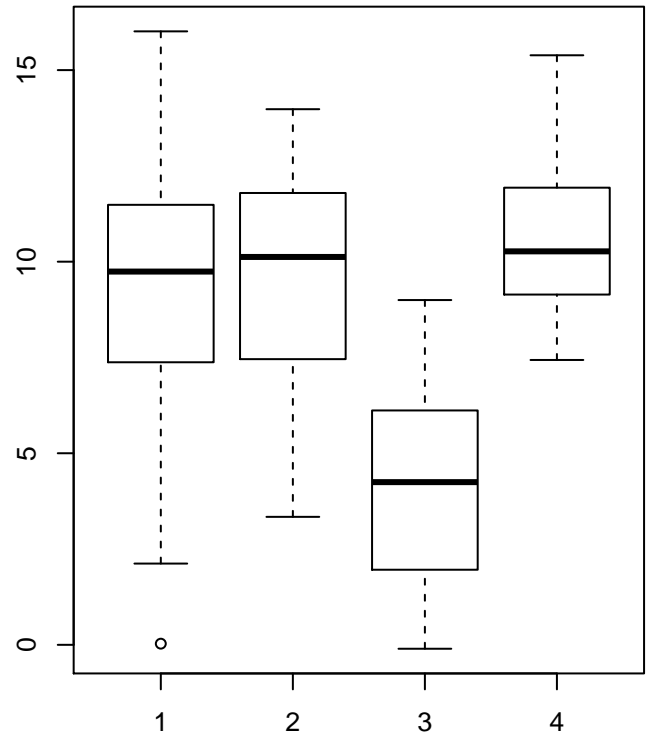

**SLITRK5**  
Kruskal.p= 2.224e-06

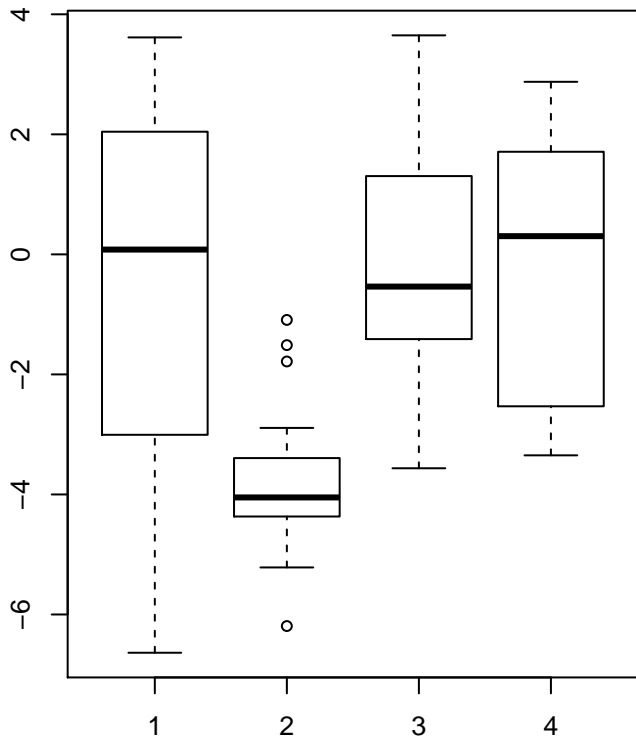

**GULP1**  
Kruskal.p= 2.781e-06

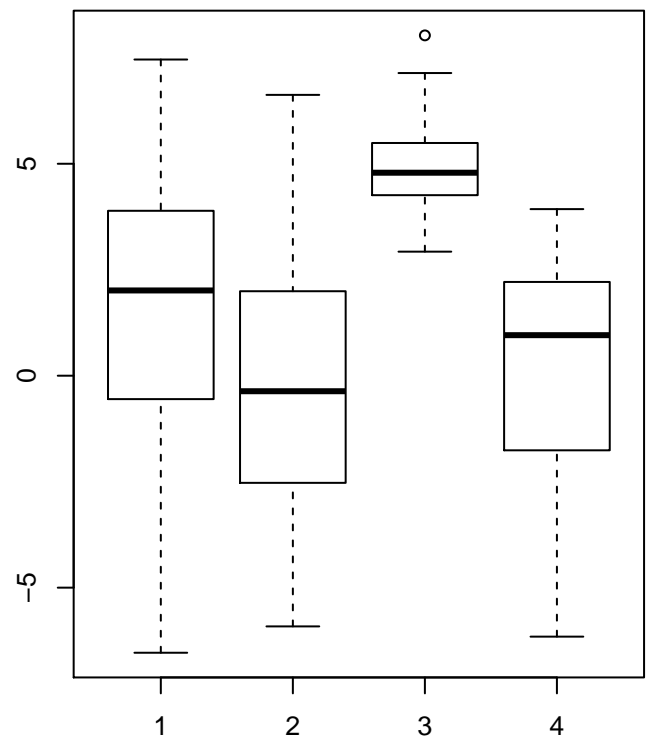



**DPP10**  
Kruskal.p= 8.953e-06

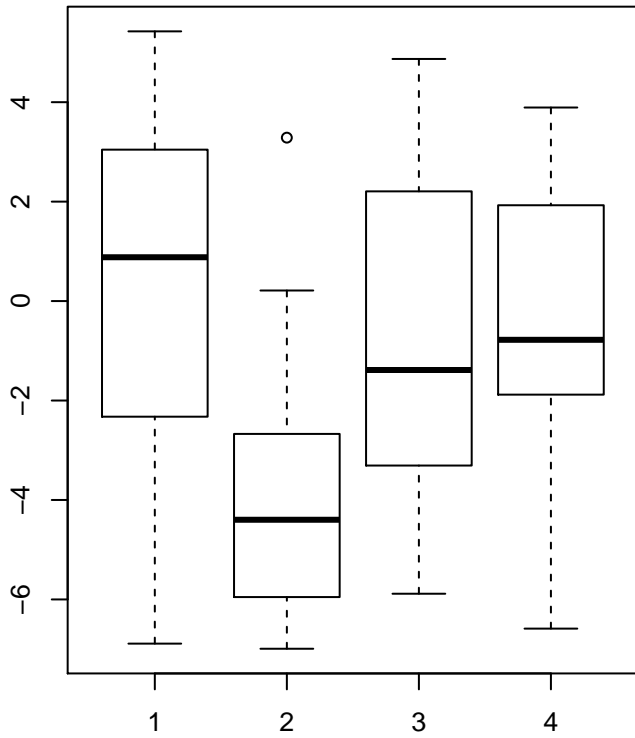

**STC1**  
Kruskal.p= 1.987e-05

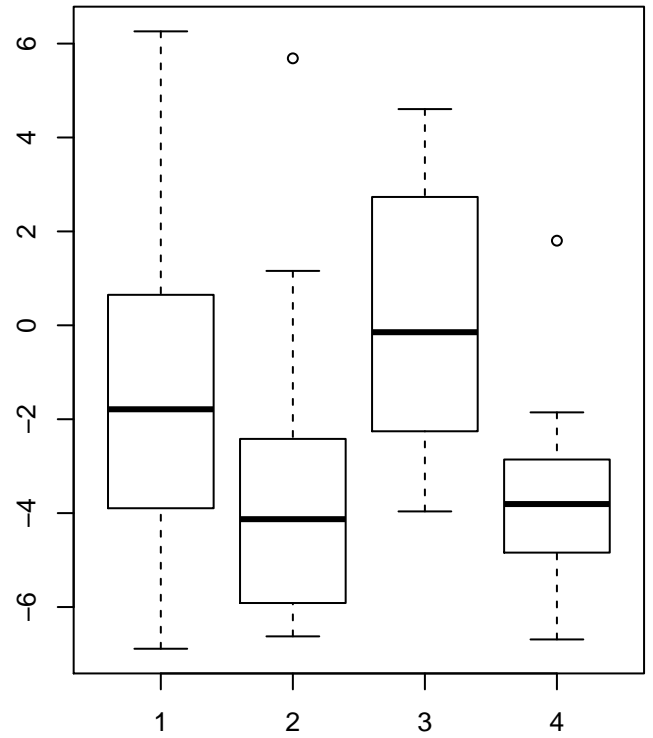

**PABPC4L**  
Kruskal.p= 2.093e-05

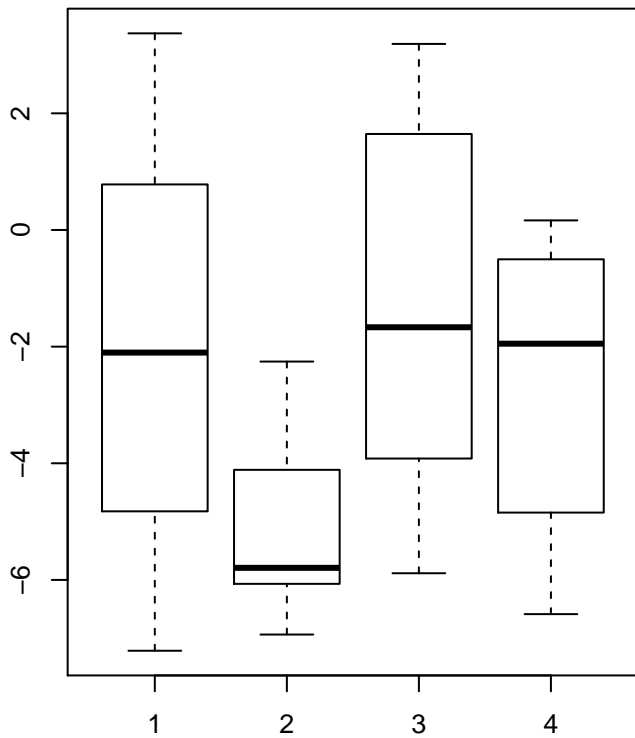

**CD300E**  
Kruskal.p= 2.4e-05

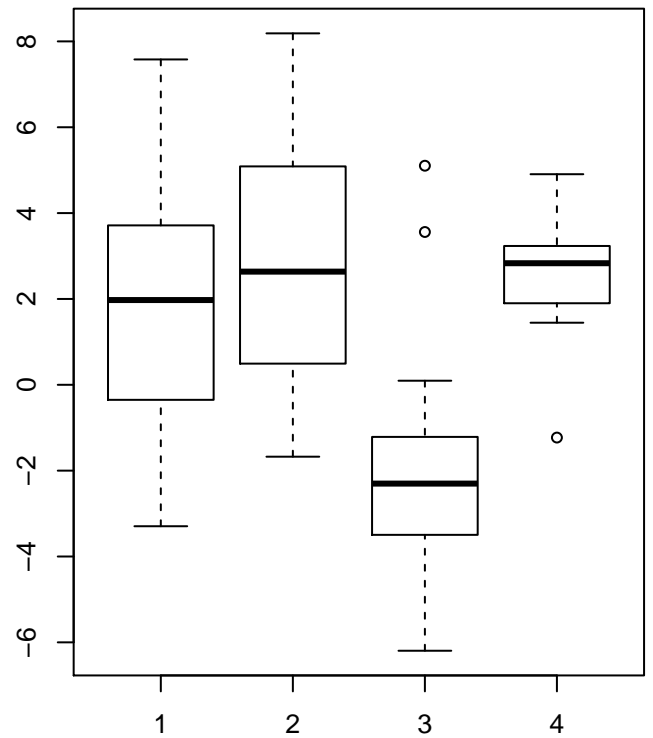

**GPC6**  
Kruskal.p= 3.546e-05

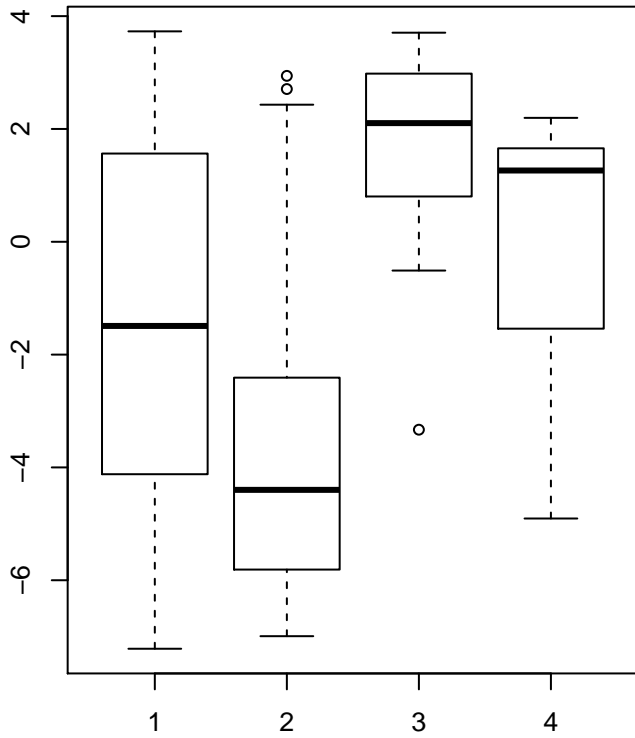

**KRT79**  
Kruskal.p= 4.019e-05

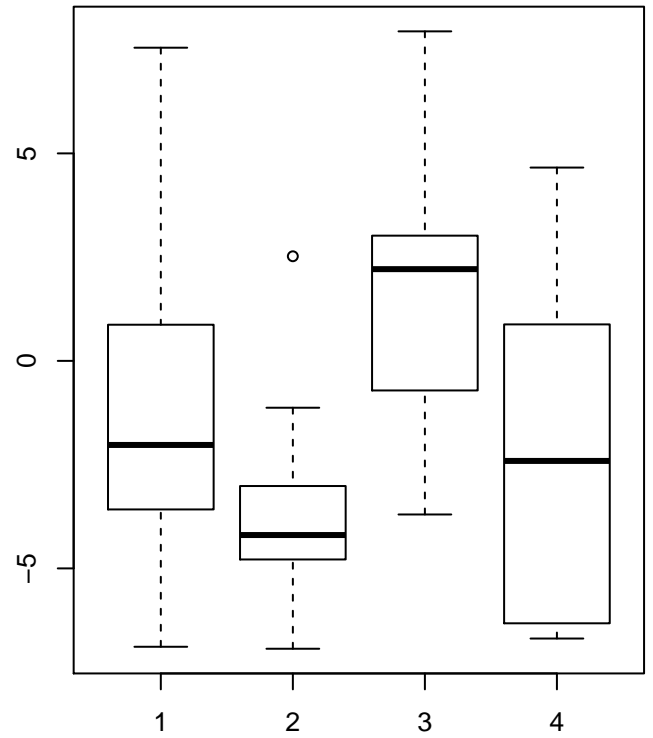

**HIST1H4F**  
Kruskal.p= 6.991e-05

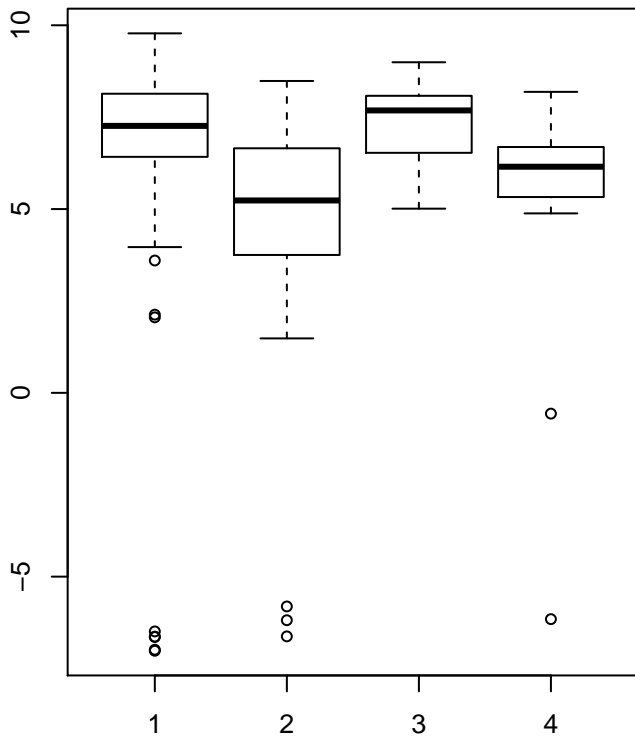

**TMEM233**  
Kruskal.p= 7.01e-05

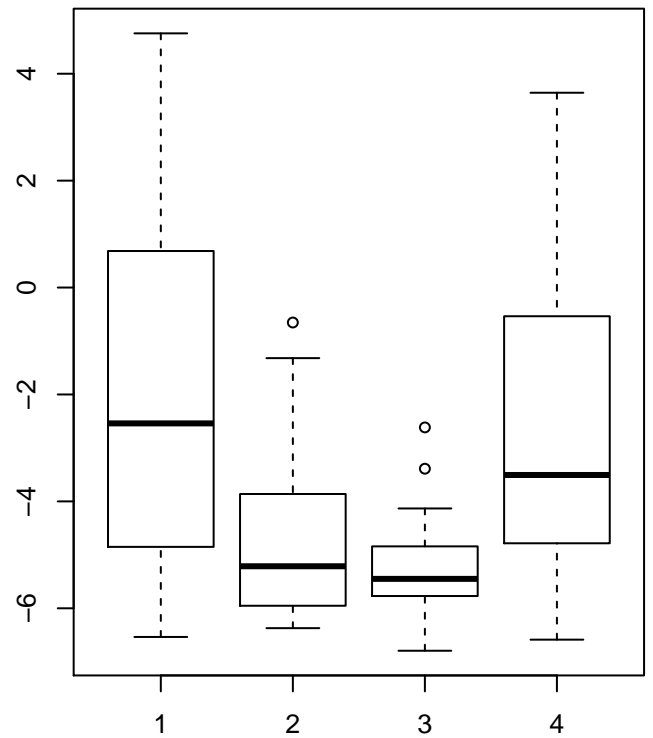

**TMEM98**  
Kruskal.p= 0.0001058

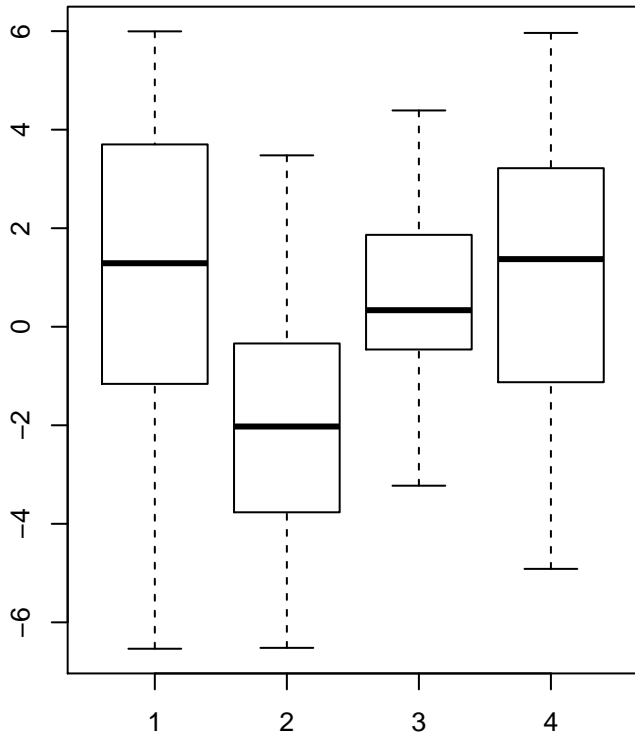

**DPPA4**  
Kruskal.p= 0.0001131

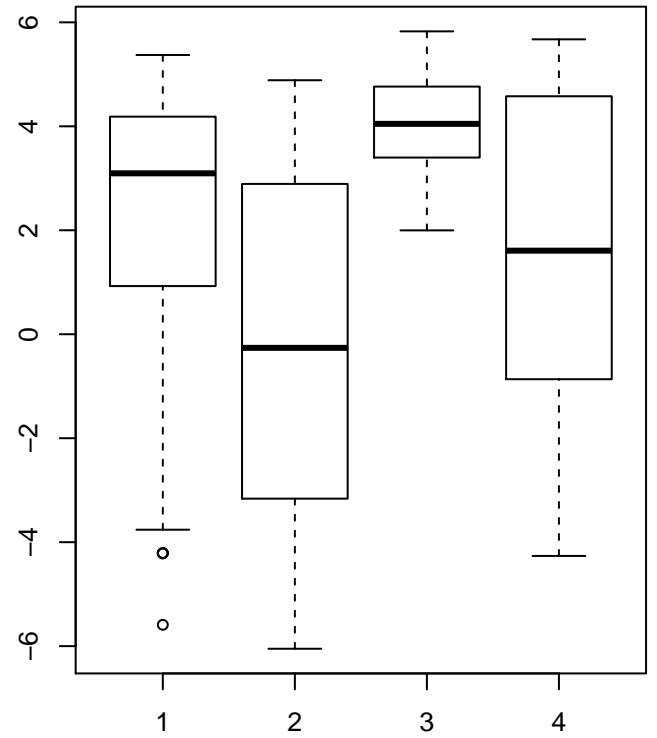

**DDIT4L**  
Kruskal.p= 0.0001392

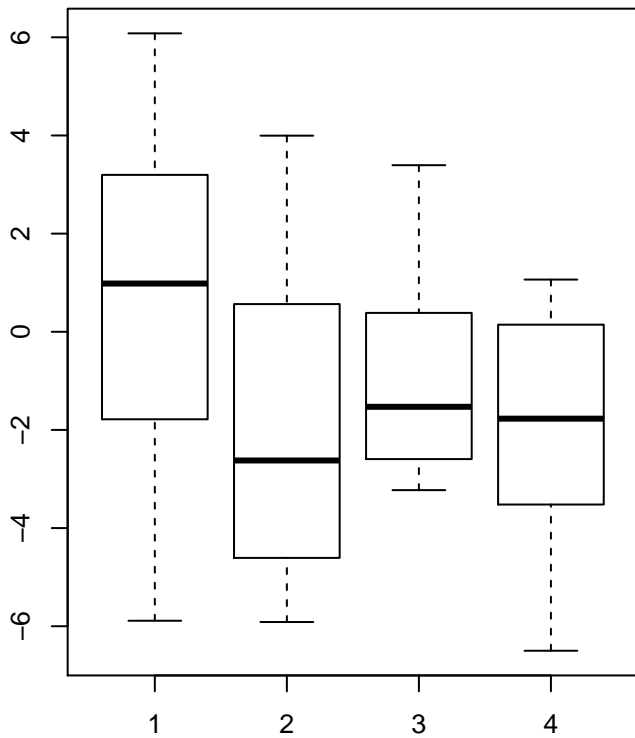

**MYO18B**  
Kruskal.p= 0.0004486

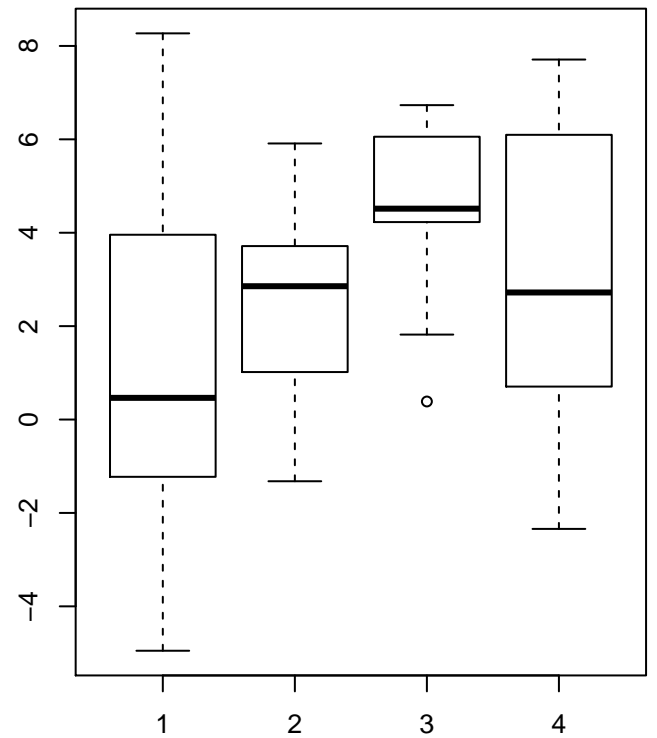

**MKRN3**  
Kruskal.p= 0.0006196

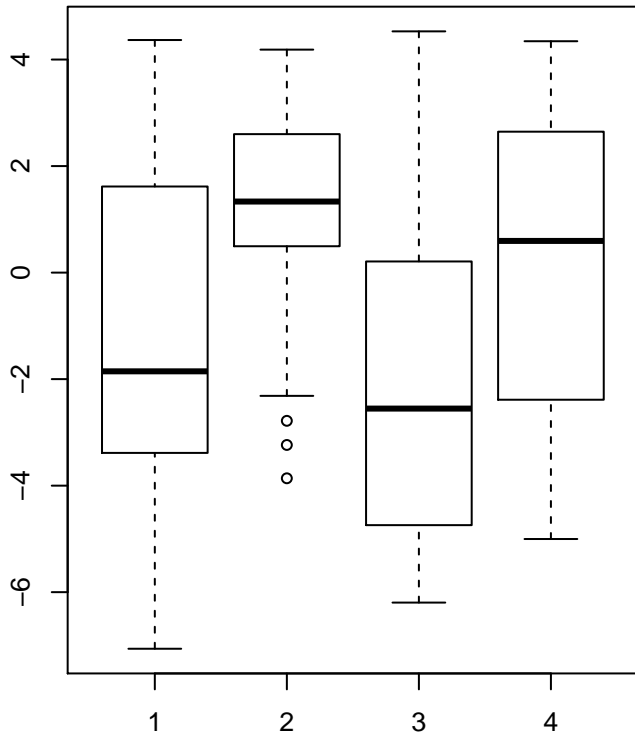

**DEFB1**  
Kruskal.p= 0.0008828

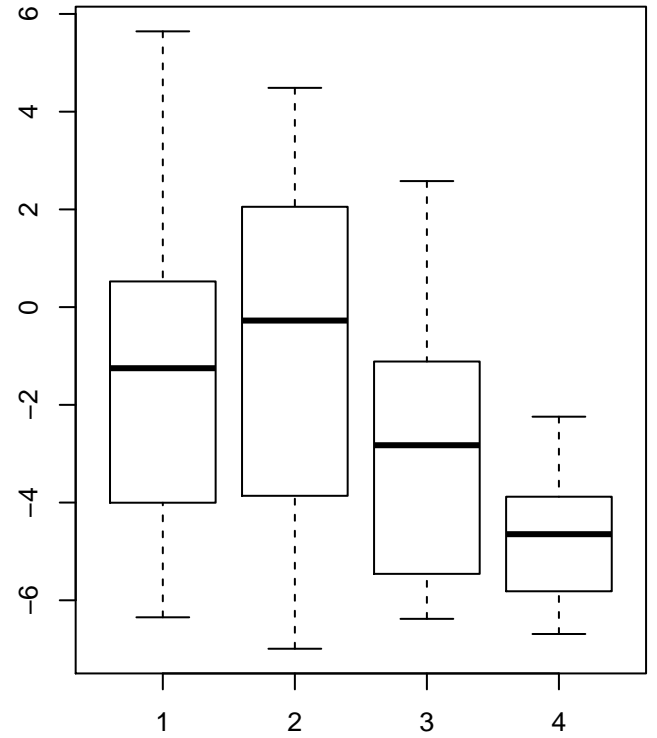

**EDIL3**  
Kruskal.p= 0.001183

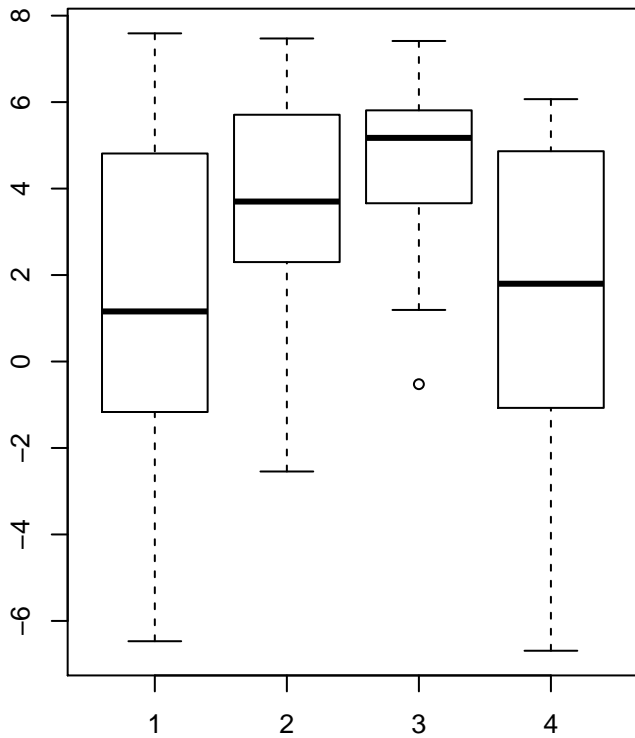

**PRAME**  
Kruskal.p= 0.001483

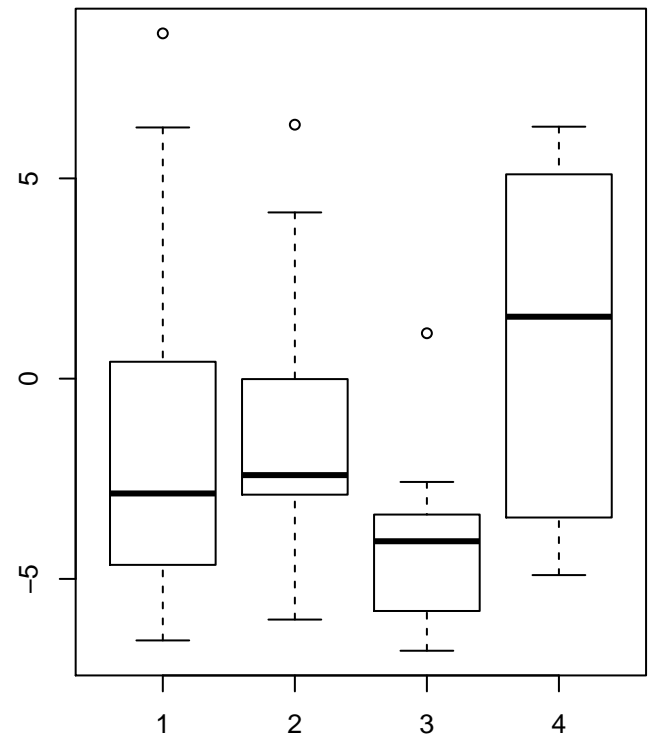

**IRX1**  
Kruskal.p= 0.002012

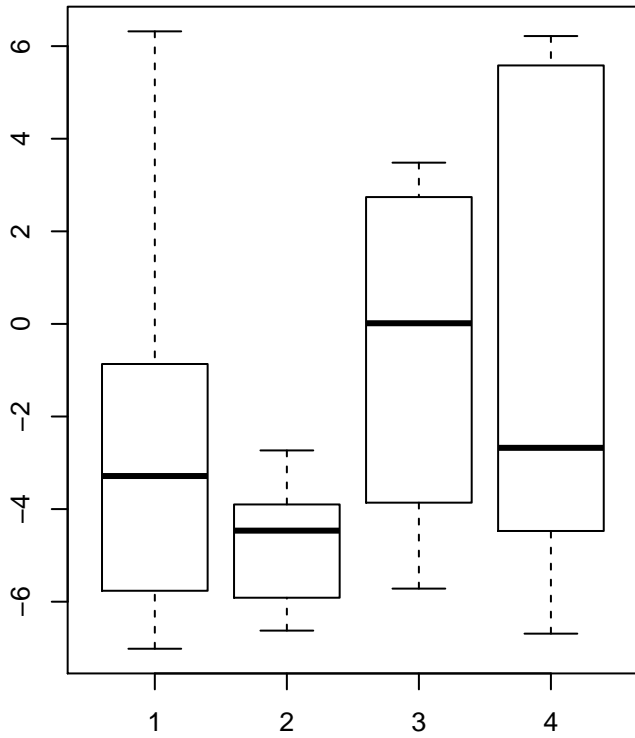

**PRSS21**  
Kruskal.p= 0.01031

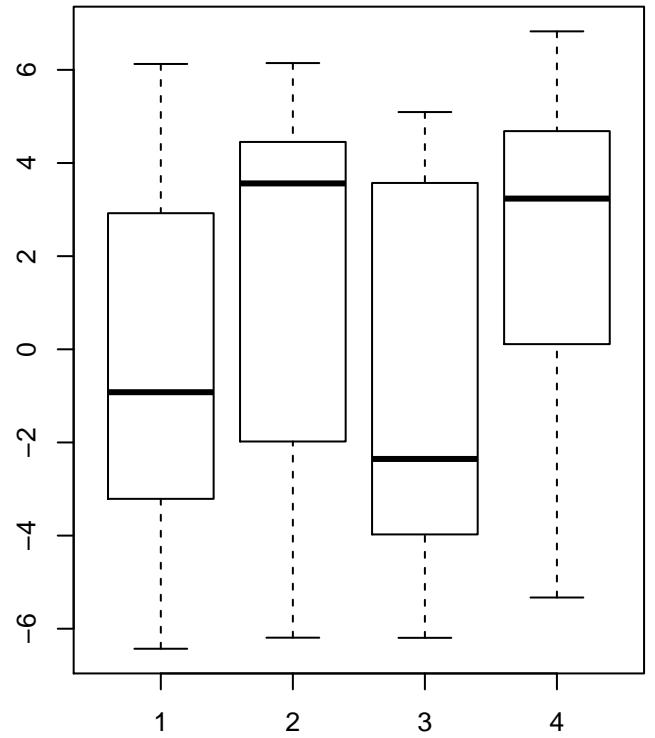

**DES**  
Kruskal.p= 0.0108

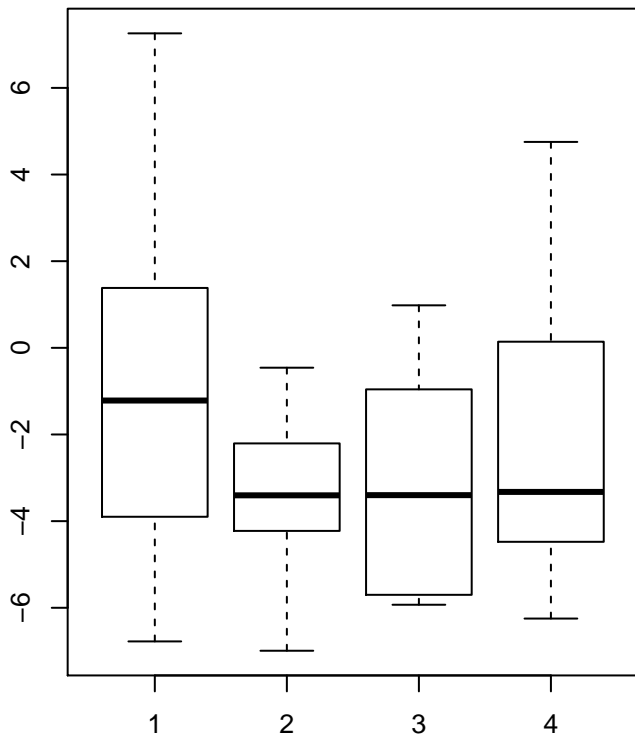

**AL589743.1**  
Kruskal.p= 0.01302

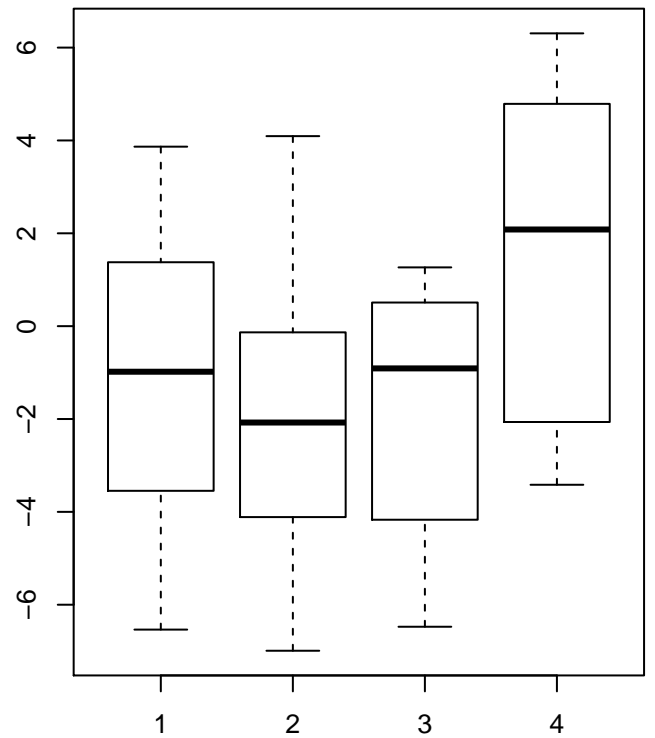

**KCNK1**  
Kruskal.p= 0.035

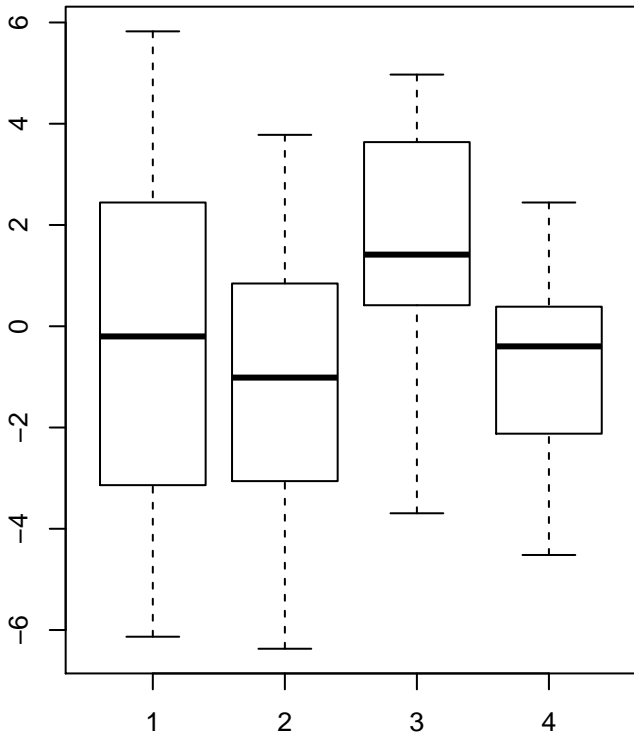

**RP1-90G24.10**  
Kruskal.p= 0.03697

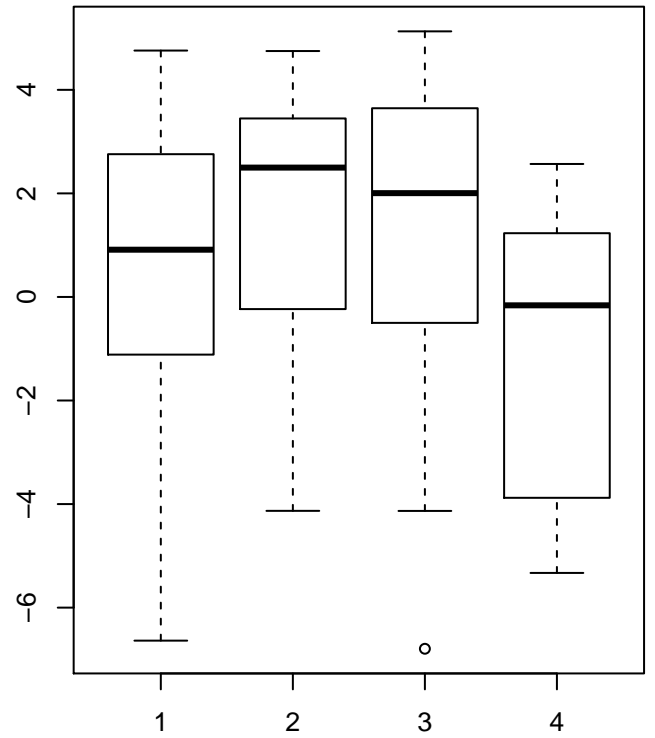

**RP11-20D14.6**  
Kruskal.p= 0.04317

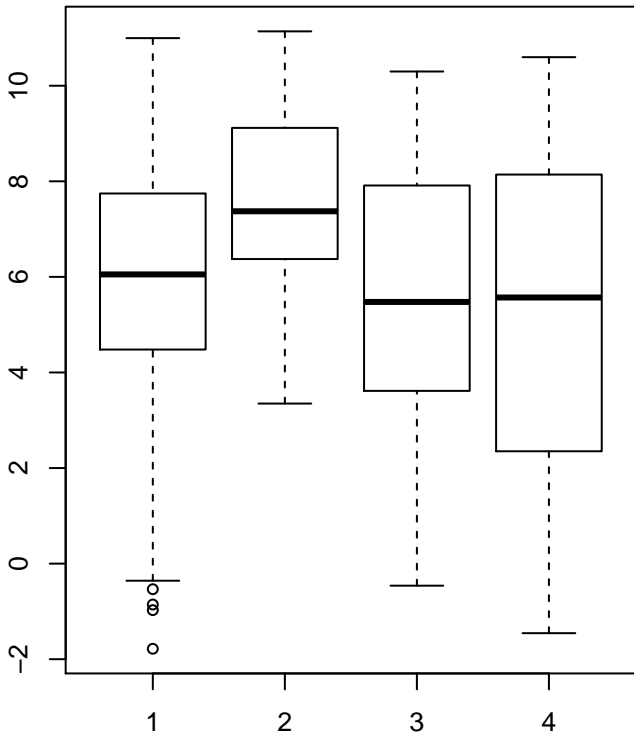

**PYURF**  
Kruskal.p= 0.05305

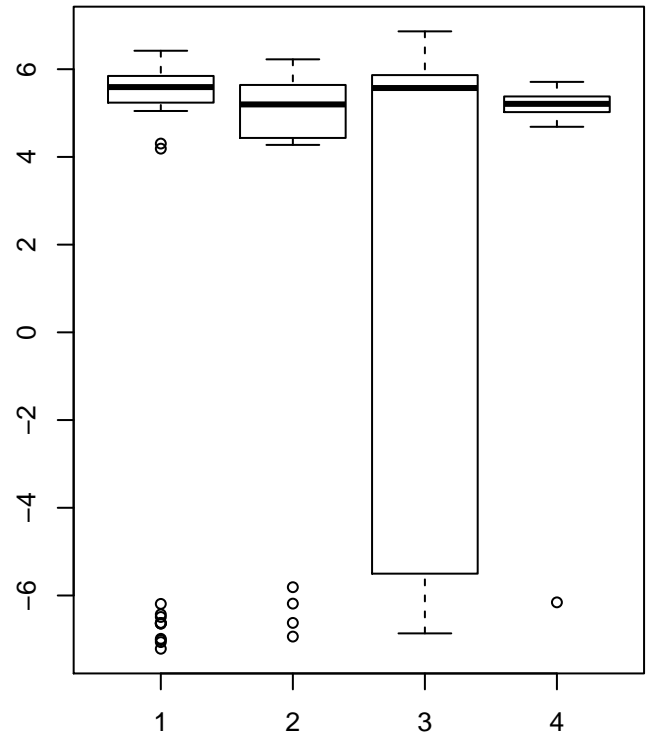

**RPL3L**  
Kruskal.p= 0.08875

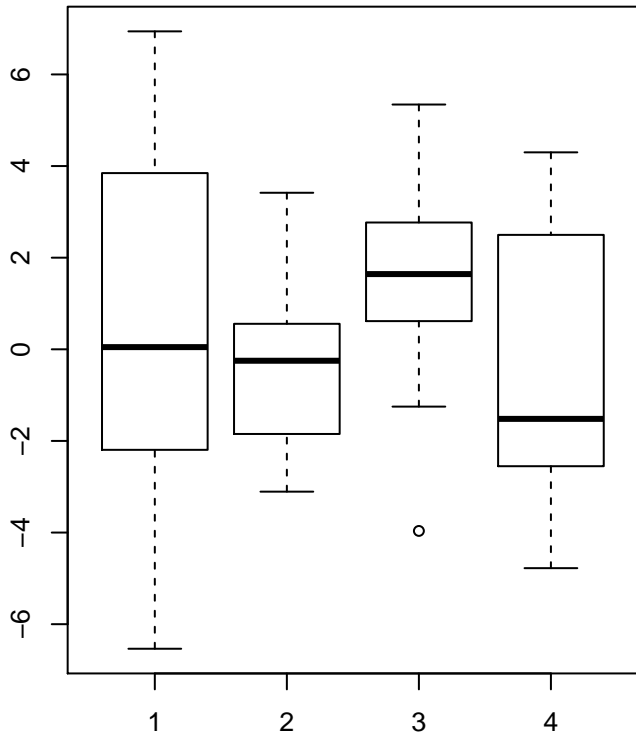

**KIAA1199**  
Kruskal.p= 0.09159

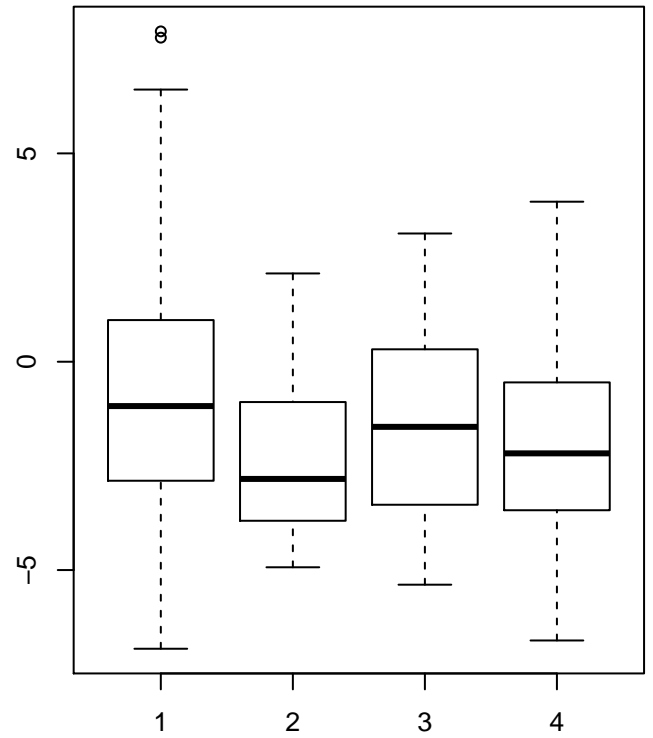

**GSTT1**  
Kruskal.p= 0.1756

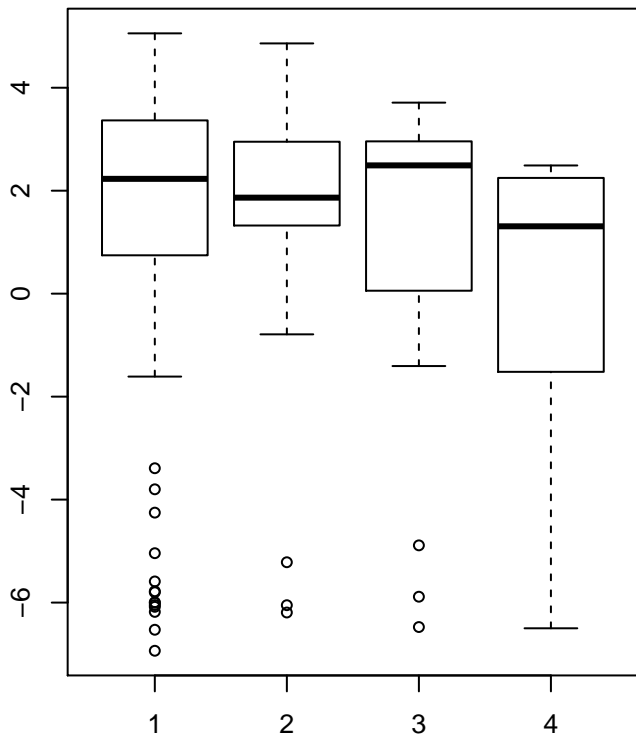

**HIST1H1A**  
Kruskal.p= 0.2126

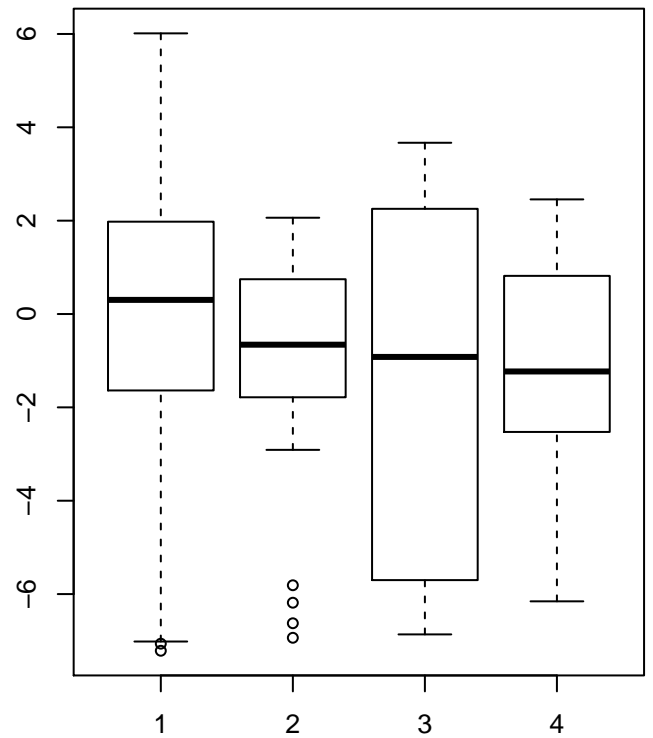

**RP11-734I18.1**  
Kruskal.p= 0.2246

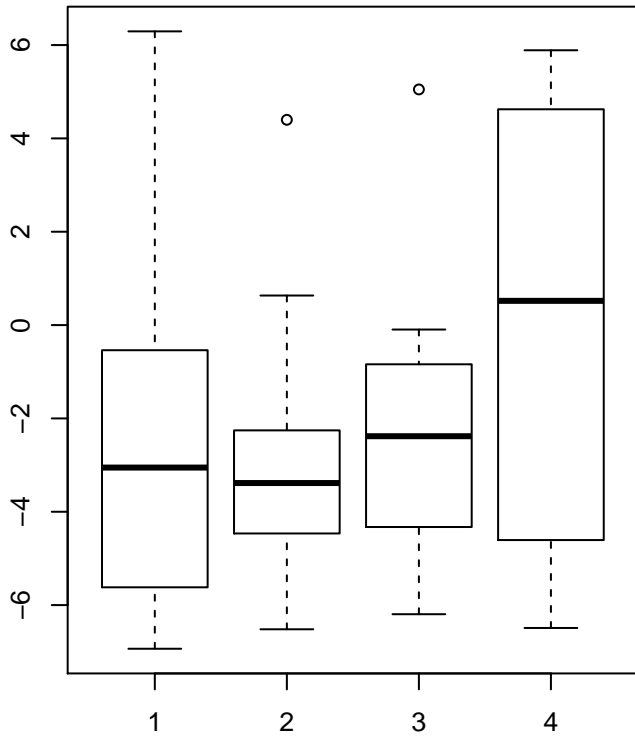

**DNTT**  
Kruskal.p= 0.2802

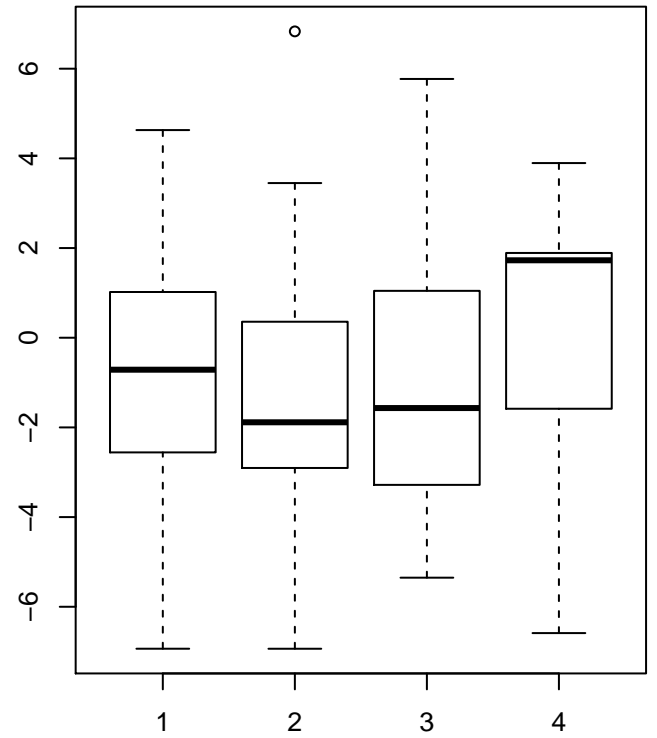

**CCL7**  
Kruskal.p= 0.4051

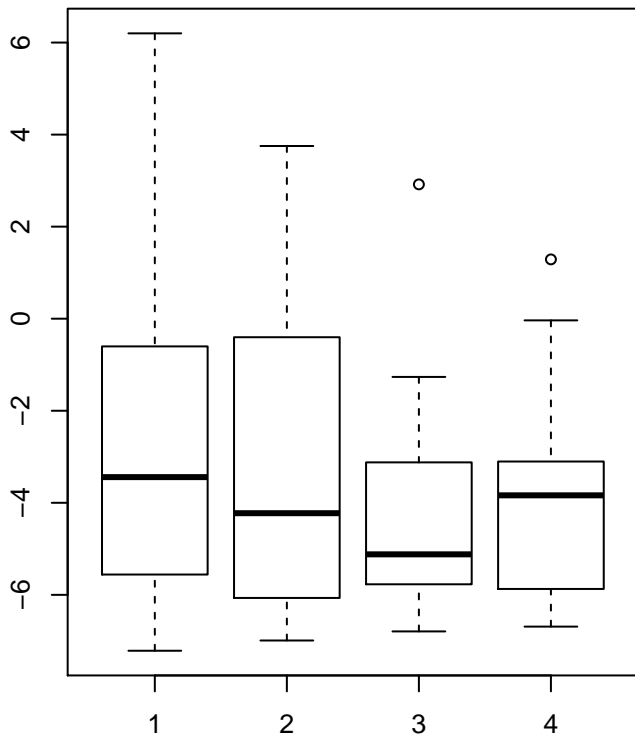

**ZFP57**  
Kruskal.p= 0.5802

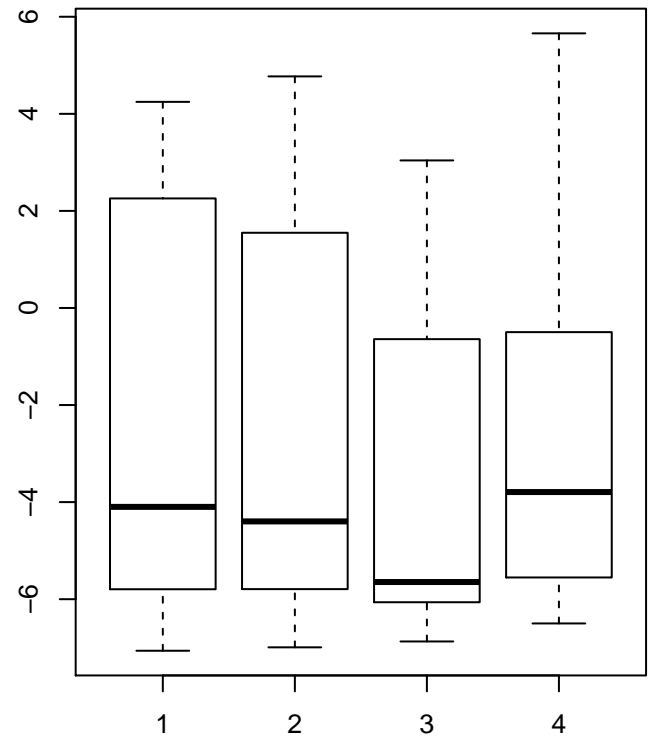



**VSTM4**  
Kruskal.p= 0.7

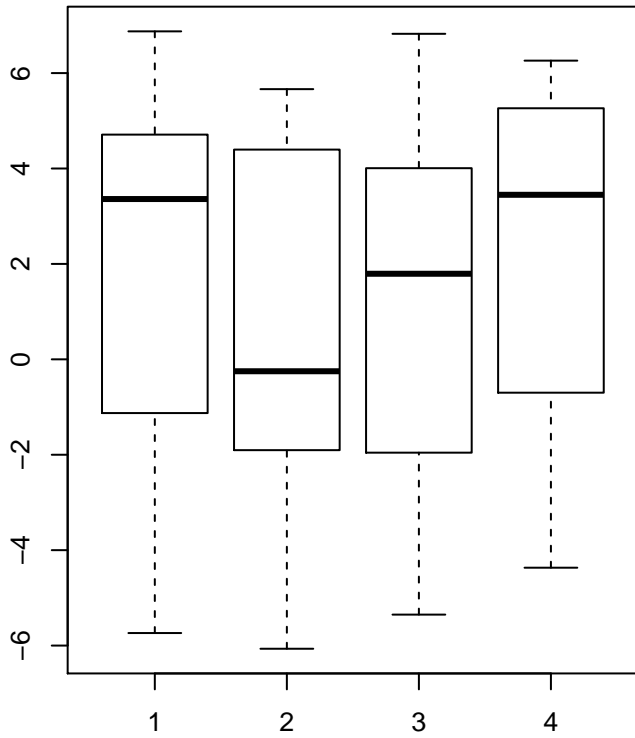

**GSTM1**  
Kruskal.p= 0.7396

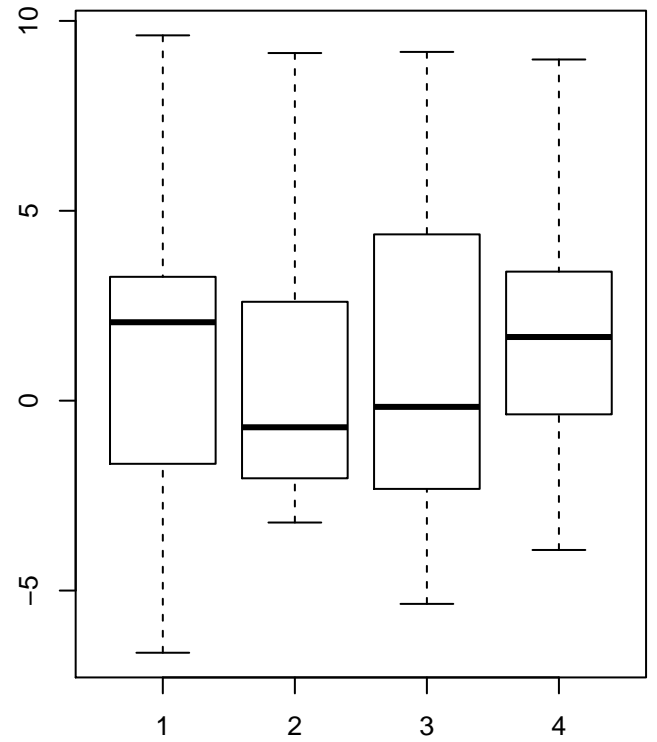

**AC091814.2**  
Kruskal.p= 0.92

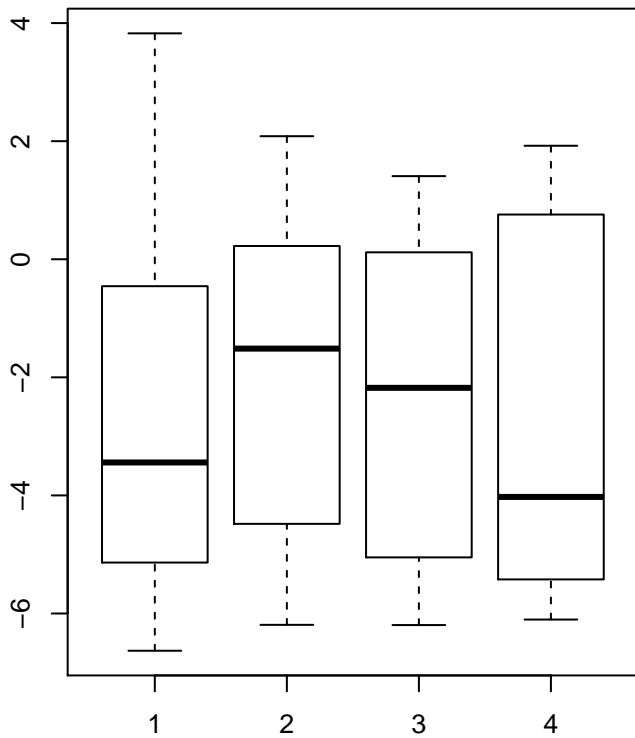

**PNMAL1**  
Kruskal.p= 0.9778

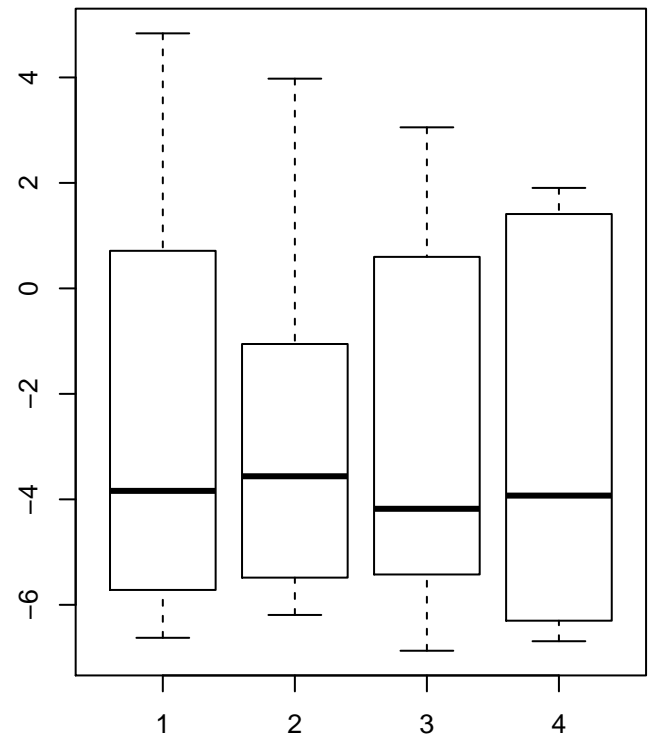

Supplement: NIHMS1055580-supplement-Supplemental_gene_expression_by_DIBS_classifier.pdf [file NIHMS1055580-supplement-Supplemental_gene_expression_by_DIBS_classifier.pdf]
